# Supplementary material for: Catalytic O2 activation toward oxidative N–S bond formation by a thiolato Fe(iii) complex
Source: Royal Society of Chemistry journal article supplement (doi:10.1039/d2cc05375f), 2022-01-01
Supplement: d2cc05375f1.pdf [file d2cc05375f1.pdf]

# Catalytic O<sub>2</sub> Activation toward Oxidative N-S Bond Formation by a Thiolato Fe(III) Complex

*Chang-Chih Hsieh, Cheng-Yao Li, Ming-Hsi Chiang and Yih-Chern Horng\**

Department of Chemistry, National Changhua University of Education, Changhua 50058, Taiwan

Institute of Chemistry, Academia Sinica, Taipei 11528, Taiwan

Department of Medicinal and Applied Chemistry, Kaohsiung Medical University, Kaohsiung 80708, Taiwan

## Electronic Supporting Information

### Table of Contents

|                     | <b>Title</b>                                                                    | <b>P.</b> |
|---------------------|---------------------------------------------------------------------------------|-----------|
|                     | Materials and Methods                                                           | 2~8       |
| <b>Table S1-5</b>   | The summary of crystallographic data for the organic substrates and products.   | 9-13      |
| <b>Table S6</b>     | The summary of crystallographic data for complex <b>4</b> .                     | 14        |
| <b>Table S7</b>     | The selected bond lengths and angles of complex <b>1</b> and <b>4</b> .         | 15        |
| <b>Figure S1-20</b> | ORTEP drawings of the organic substrates and products.                          | 16-22     |
| <b>Figure S21</b>   | X-band EPR spectra (77K, CH <sub>3</sub> CN) of complex <b>1</b> and <b>4</b> . | 23        |
| <b>Figure S22</b>   | The solid IR spectra of complex <b>1</b> and <b>4</b> .                         | 24        |
|                     | References                                                                      | 25        |

## Materials and Methods

**General Procedures.** Commercially available chemicals were purchased from Aldrich or Acros, and used as received. All solvents except DMSO were distilled, dried, and stored in dried N<sub>2</sub>-filled reservoirs containing 4 Å molecular sieves before use. THF and hexane were distilled under nitrogen using sodium-benzophenone as a drying reagent. Ether and DMF were distilled under nitrogen using CaH<sub>2</sub> as a drying reagent. DMSO was purged under nitrogen and then stored in dried N<sub>2</sub>-filled reservoirs containing 4 Å molecular sieves. The complexes<sup>1</sup> **1** and **1'**, substrates (**2b**, **2c**, **2d**, **2i**, **2m** and **2r**)<sup>2</sup> and products (**3b**, **3c**, **3e**, **3h**, **3l**, **3m**, **3p**, **3q** and **3r**)<sup>3</sup> was synthesized and identified by following the published procedures. <sup>1</sup>H, and <sup>13</sup>C NMR spectra were collected on an Avance 300 spectrometer. Chemical shifts for <sup>1</sup>H and <sup>13</sup>C{<sup>1</sup>H} spectra were recorded in ppm relative to the residual proton and <sup>13</sup>C of CDCl<sub>3</sub> (<sup>1</sup>H: δ 7.24; <sup>13</sup>C: δ 77.0) and DMSO-d<sub>6</sub> (<sup>1</sup>H: δ 2.50; <sup>13</sup>C: δ 39.5). Infrared spectra were recorded on a Bruker Alpha instrument using ZnSe discs (0.2 mm, KBr windows). EPR spectra were monitored at X-band frequencies by using a Bruker EMSplus spectrometer with 8" magnet and 2.7 kW power supply. Elemental analyses and MS spectrometry were performed on a Heraeus CHN-OS Rapid Elemental Analyzer and JEOL JMX-SX/SX 102A Mass Spectrometer at the Instruments Center of National Chung Hsing University, Taiwan.

### Crystallography

The crystals suitable for structure analysis were mounted on a glass fiber with silicone grease and placed in the cold stream of a Bruker APEX II with graphite monochromated Mo K<sub>α</sub> radiation (λ = 0.71073 Å) at 150(2) K. All structures were solved by direct methods using SHELXS-97 and refined by full-matrix least squares methods against F<sup>2</sup> with SHELXL-97.<sup>4</sup> Tables of neutral atom scattering factors, f' and f'', and absorption coefficients are from a standard source.<sup>5</sup> All atoms except for hydrogen atoms were refined with anisotropic displacement parameters. In general, hydrogen atoms were fixed at calculated positions, and their positions were refined using a riding model. Crystallographic data collection and refinement parameters are given in Table S1-S6.

### *In situ* time-dependant NMR experiment for the catalysis of S-N bond formation by complex 1' or complex 1 with oxygen

In the glove-box, a mixture of 1 equiv. of complex **1'** or complex **1** and 4 equiv. of (LNHS)<sub>2</sub> in DMSO-d<sub>6</sub> (400 μL) was transferred to a J. Young NMR tube. After collecting the first NMR spectrum of solution without adding oxygen, the J. Young NMR tube was degassed with the vacuum system and then filled with pure oxygen gas to conduct the *in situ* NMR experiment at 0.5, 2, 6, 12 and 24 hrs.

### Synthesis of 2,2'-dithiobis[N-(methoxyphenyl)]benzamide (**2e**)

A solution of 0.25 g (2.1 mmol) of *o*-anisidine in 10 mL DCM was added dropwise to a solution of 0.35 g (1.0 mmol) of 2,2'-dithiosalicyl chloride in 20 mL DCM at 298 K. After 30 mins, the 0.5 mL NEt<sub>3</sub> was added to the above solution, and the solution was stirred for further 12 hrs. The resulting solution was washed with 50 mL H<sub>2</sub>O three times, and the organic layer was collected, dried over with anhydrous MgSO<sub>4</sub> and filtrated. The solvent of the filtrate was removed by vacuum system to obtain the white solid 0.29 g (Yield: 55%). <sup>1</sup>H NMR

(DMSO- $d_6$ ): 9.73 (br, 2H), 7.83 (d,  $J = 7.4$  Hz, 2H), 7.77 (d,  $J = 7.3$  Hz, 2H), 7.74 (d,  $J = 8.8$  Hz, 2H), 7.52 (t,  $J = 7.9$  Hz, 2H), 7.37 (t,  $J = 7.3$  Hz, 2H), 7.22 (t,  $J = 7.8$  Hz, 2H), 7.11 (d,  $J = 8.2$  Hz, 2H), 6.99 (t,  $J = 7.6$  Hz, 2H), 3.84 (s, 6H).  $^{13}\text{C}$  NMR: 165.64, 151.66, 136.95, 133.91, 131.51, 128.47, 126.45, 126.25, 126.13, 126.09, 124.50, 120.23, 111.59, 55.74.

### Synthesis of 2,2'-dithiobis[N-(2-methyl)tetrahydrofuranyl]benzamide (2f)

A solution of 0.21 g (2.1 mmol) of 2-(aminomethyl)tetrahydrofuran in 10 mL DCM was added dropwise to a solution of 0.35 g (1.0 mmol) of 2,2'-dithiosalicyl chloride in 20 mL DCM at 298 K. After 30 mins, the 0.5 mL  $\text{NEt}_3$  was added to the above solution, and the solution was stirred for further 12 hrs. The resulting solution was washed with 50 mL  $\text{H}_2\text{O}$  three times, and the organic layer was collected, dried over with anhydrous  $\text{MgSO}_4$  and filtrated. The solvent of the filtrate was removed by vacuum system to obtain the white solid 0.40 g (Yield: 86%).  $^1\text{H}$  NMR (DMSO- $d_6$ ): 8.71 (t,  $J = 4.9$  Hz, 2H), 7.62(d,  $J = 7.8$  Hz, 4H), 7.44 (t,  $J = 8.0$  Hz, 2H), 7.29 (t,  $J = 7.3$  Hz, 2H), 3.99 (quin,  $J = 6.2$  Hz, 2H), 3.79 (q,  $J = 6.9$  Hz, 2H), 3.63 (q,  $J = 7.1$  Hz, 2H), 3.32 (q,  $J = 6.1$  Hz, 4H), 1.92 (m, 4H), 1.83 (m, 2H), 1.64 (m, 2H).  $^{13}\text{C}$  NMR: 167.04, 136.68, 133.88, 131.09, 128.00, 125.97, 125.68, 77.02, 67.3, 43.33, 28.83, 25.18. IR (KBr): 3340 (br,  $\nu_{\text{NH}}$ ), 1629 (s,  $\nu_{\text{C=O}}$ )  $\text{cm}^{-1}$ . EA: C: 60.99, H: 5.97, N: 5.93; found: C: 60.89, H: 5.79, N: 5.66. HRMS  $m/z$  calcd for  $\text{C}_{24}\text{H}_{28}\text{O}_4\text{N}_2\text{NaS}_2$   $[\text{M}+\text{Na}]^+$ : 495.1389; found: 495.1383.

### Synthesis of 2,2'-dithiobis[N-2-(2-cyclohexenyl)-ethyl]benzamide (2g)

A solution of 0.41 g (3.3 mmol) of 2-(1-cyclohexenyl)ethylamine in 10 mL DCM was added dropwise to a solution of 0.54 g (1.6 mmol) of 2,2'-dithiosalicyl chloride in 20 mL DCM at 298 K. After 30 mins, the 0.75 mL  $\text{NEt}_3$  was added to the above solution, and the solution was stirred for further 12 hrs. The resulting solution was washed with 50 mL  $\text{H}_2\text{O}$  three times, and the organic layer was collected, dried over with anhydrous  $\text{MgSO}_4$  and filtrated. The solvent of the filtrate was removed by vacuum system to obtain the white solid 0.50 g (Yield: 60%).  $^1\text{H}$  NMR (DMSO- $d_6$ ): 8.55 (t,  $J = 5.6$  Hz, 2H), 7.60 (d,  $J = 7.9$  Hz, 2H), 7.57 (d,  $J = 7.3$  Hz, 2H), 7.42 (t,  $J = 8.0$  Hz, 2H), 7.29 (t,  $J = 7.4$  Hz, 2H), 5.44 (s, 2H), 3.37 (s, 4H), 2.17 (t,  $J = 6.7$  Hz, 4H), 1.95 (m, 8H), 1.54 (m, 8H).  $^{13}\text{C}$  NMR: 166.75, 136.52, 134.92, 134.24, 130.95, 127.84, 125.98, 125.54, 122.26, 37.66, 37.47, 27.63, 24.82, 22.52, 22.03. IR (KBr): 3305 (br,  $\nu_{\text{NH}}$ ), 1632 (s,  $\nu_{\text{C=O}}$ )  $\text{cm}^{-1}$ . EA: C: 69.19, H: 6.97, N: 5.38; found: C: 68.86, H: 6.59, N: 5.30. HRMS  $m/z$  calcd for  $\text{C}_{30}\text{H}_{36}\text{O}_2\text{N}_2\text{NaS}_2$   $[\text{M}+\text{Na}]^+$ : 543.2121; found: 543.2110.

### Synthesis of 2,2'-dithiobis[N-(2-hydroxyethyl)]benzamide (2h)

The solution of 0.35 g (1.0 mmol) of 2,2'-dithiosalicyl chloride in 20 mL DCM was slowly added to the flask contained 0.13 g (2.1 mmol) ethanolamine in an ice bath. After 30 mins, 0.5 mL  $\text{NEt}_3$  was added to the above solution, and the solution was stirred for further 16 hrs. The precipitate of the resulting solution was filtrated, washed with 50 mL  $\text{H}_2\text{O}$  three times and 20 mL DCM twice, and then it was dried under vacuum to obtain the white product 0.25 g (Yield: 63%).  $^1\text{H}$  NMR (DMSO- $d_6$ ): 8.62 (t,  $J = 4.8$  Hz, 2H), 7.68 (d,  $J = 7.4$  Hz, 2H), 7.63(d,  $J = 8.0$  Hz, 2H), 7.44 (t,  $J = 7.4$  Hz, 2H), 7.28 (t,  $J = 7.4$  Hz, 2H), 4.87 (t,  $J = 5.1$  Hz, 2H), 3.55 (t,  $J = 6.0$  Hz, 4H), 3.35 (q,  $J = 5.7$  Hz, 4H).  $^{13}\text{C}$  NMR: 167.28, 136.91, 133.90, 131.32, 128.25, 126.14, 125.87, 59.84, 42.35. IR (KBr): 3286(br,  $\nu_{\text{OH}}$ ), 1633(s,  $\nu_{\text{C=O}}$ )  $\text{cm}^{-1}$ . EA: C: 55.08, H: 5.14, N: 7.14; found: C: 55.07, H:

4.86, N: 7.32.

### Synthesis of 2,2'-dithiolbis[N-(2-(dimethylamino)-ethyl)benzamide (2i)]

The solution of 0.35 g (1.0 mmol) of 2,2'-dithiosalicyl chloride in 20 mL DCM was slowly added to the flask contained 0.18 g (2.0 mmol) N,N-dimethylethylenediamine in an ice bath. After 30 mins, 1.0 mL NEt<sub>3</sub> was added to the above solution, and the solution was stirred for further 12 hrs. The resulting solution was washed with 50 mL H<sub>2</sub>O three times, and the organic layer was collected, dried over with anhydrous MgSO<sub>4</sub>, filtrated and dried under vacuum system. The resident was washed with 15 mL ether twice and then dried under vacuum system to obtain the white product 0.24 g (Yield: 54%). <sup>1</sup>H NMR (DMSO-d<sub>6</sub>): 8.60 (t, *J* = 5.6 Hz, 2H), 7.64 (d, *J* = 7.9 Hz, 4H), 7.43 (t, *J* = 7.5 Hz, 2H), 7.28 (t, *J* = 7.4 Hz, 2H), 3.38 (q, *J* = 6.2 Hz, 4H), 2.45 (t, *J* = 6.8 Hz, 4H), 2.19 (s, 6H). <sup>13</sup>C NMR: 166.98, 136.83, 133.92, 131.17, 128.04, 126.06, 125.77, 58.06, 45.30, 37.51. IR (KBr): 3310 (br, ν<sub>NH</sub>), 1627 (s, ν<sub>C=O</sub>).

### Synthesis of 2,2'-dithiobis[N-(2-chloroethyl)]benzamide (2j)

The solution of 0.35 g (1.0 mmol) of 2,2'-dithiosalicyl chloride in 20 mL THF was slowly added to the flask contained 0.24 g (2.1 mmol) 2-chloroethylamine hydrochloride in an ice bath. After 30 mins, 0.35 g (2.5 mmol) K<sub>2</sub>CO<sub>3</sub> was added to the above solution, and the solution was stirred for further 16 hrs. The resulting solution was filtrated to remove salt, and the filtrate was dried under vacuum. The residues were washed by 15 mL DCM three times and then dried under vacuum to obtain the white solid 0.23 g (Yield: 53%). <sup>1</sup>H NMR (DMSO-d<sub>6</sub>): 8.93 (t, *J* = 5.4 Hz, 2H), 7.68 (d, *J* = 7.0 Hz, 2H), 7.65 (d, *J* = 7.2 Hz, 2H), 7.47 (t, *J* = 7.7 Hz, 2H), 7.32 (t, *J* = 7.4 Hz, 2H), 3.77 (t, *J* = 5.9 Hz, 4H), 3.61 (q, *J* = 5.9 Hz, 4H). <sup>13</sup>C NMR: 167.18, 136.87, 133.32, 131.38, 128.07, 126.04, 125.78, 43.13, 41.33. IR (KBr): 3291 (br, ν<sub>NH</sub>), 1626 (s, ν<sub>C=O</sub>) cm<sup>-1</sup>. EA: C: 50.35, H: 4.23, N: 6.52; found: C: 50.29., H: 4.02, N: 6.19.

### Synthesis of 2,2'-dithiobis[N-(2-methoxyethyl)]benzamide (2k)

The solution of 0.35 g (1.0 mmol) of 2,2'-dithiosalicyl chloride in 20 mL DCM was slowly added to the flask contained 0.16 g (2.1 mmol) 2-methoxyethanamine in an ice bath. After 30 mins, 0.5 mL NEt<sub>3</sub> was added to the above solution, and the solution was stirred for further 12 hrs. The resulting solution was washed with 50 mL H<sub>2</sub>O three times, and the organic layer was collected, dried over with anhydrous MgSO<sub>4</sub> and filtrated. The solvent of the filtrate was removed by vacuum system to obtain the white solid 0.26 g (Yield: 61%). <sup>1</sup>H NMR (DMSO-d<sub>6</sub>): 8.71 (t, *J* = 5.3 Hz, 2H), 7.64 (d, *J* = 6.9 Hz, 2H), 7.63 (d, *J* = 7.9 Hz, 2H), 7.45 (t, *J* = 7.5 Hz, 2H), 7.30 (t, *J* = 7.5 Hz, 2H), 3.47 (m, 8H), 3.29 (s, 6H). <sup>13</sup>C NMR: 166.98, 136.75, 133.57, 131.13, 127.99, 125.93, 125.67, 70.33, 57.98, 39.03. IR (KBr): 3307 (br, ν<sub>NH</sub>), 1627 (s, ν<sub>C=O</sub>) cm<sup>-1</sup>. EA: C: 57.12, H: 5.75, N: 6.66; found: C: 56.70, H: 5.31, N: 6.52.

### Synthesis of 2,2'-dithiobis[N-(methoxycarbonyl)-methyl]benzamide (2l)

The solution of 0.35 g (1.0 mmol) of 2,2'-dithiosalicyl chloride in 20 mL DCM was slowly added to the flask contained 0.27 g (2.1 mmol) glycine methyl ester hydrochloride in an ice bath. After 30 mins, 1.0 mL NEt<sub>3</sub> was added to the above solution, and the solution was stirred for further 12 hrs. The resulting solution was washed with 50 mL H<sub>2</sub>O three times, and the organic layer was collected, dried over with anhydrous MgSO<sub>4</sub>

and filtrated. The solvent of the filtrate was removed by vacuum system to obtain the white solid 0.35 g (Yield: 78%). <sup>1</sup>H NMR (DMSO-d<sub>6</sub>): 9.13(t, *J* = 6.1 Hz, 2H), 7.74 (d, *J* = 7.6 Hz, 2H), 7.67 (d, *J* = 7.9 Hz, 2H), 7.49, (t, *J* = 7.2 Hz, 2H), 7.34 (t, *J* = 7.5 Hz, 2H), 4.06 (d, *J* = 5.7 Hz, 4H), 3.68 (s, 6H). <sup>13</sup>C NMR: 170.20, 167.35, 137.19, 132.51, 131.64, 128.23, 126.03, 125.75, 51.89, 41.17. IR (KBr): 3308 (br, ν<sub>NH</sub>), 1756, 1636(s, ν<sub>C=O</sub>) cm<sup>-1</sup>. EA: C: 53.56, H: 4.49, N: 6.25; found: C: 53.36, H: 4.42, N: 6.60.

### Synthesis of 2,2'-dithiobis[N-(carboxyl)methyl]benzamide (2m)

The 10 mL 2 M NaOH aqueous solution was transferred to the solution of 0.45 g (1.0 mmol) of 2,2'-dithiobis[N-(methoxycarbonylmethyl)] benzamide in 30 mL MeOH at room temperature for 30 mins. The organic solvent was removed from the resulting solution by vacuum system. The aqueous layer was extracted with DCM (30 mL) twice to remove unreacted organic material. The gray solid was precipitated by adding 10 % HCl aqueous solution to the resulting aqueous layer (pH < 7). The solid was collected, washed with H<sub>2</sub>O (10 mL) twice, and dried under vacuum system to obtain the product 0.37g (Yield: 88%). <sup>1</sup>H NMR (DMSO-d<sub>6</sub>): 12.74 (br, 2H), 9.01 (t, *J* = 5.7 Hz, 2H), 7.73 (d, *J* = 7.5 Hz, 2H), 7.66 (d, *J* = 8.0 Hz, 2H), 7.46 (t, *J* = 7.5 Hz, 2H), 7.33 (t, *J* = 7.4 Hz, 2H), 3.96 (d, *J* = 5.8 Hz, 4H). <sup>13</sup>C NMR: 171.21, 167.27, 137.25, 132.70, 131.60, 128.24, 126.00, 125.77, 41.24. IR (KBr): 3285 (br, ν<sub>OH</sub> and ν<sub>NH</sub>), 1723, 1636 (s, ν<sub>C=O</sub>) cm<sup>-1</sup>. EA: C: 51.42, H: 3.84, N: 6.66; found: C: 51.39, H: 3.66, N: 6.70.

### Synthesis of 2,2'-dithiobis[N-(3-pyridinylmethyl)]benzamide (2n)

The solution of 0.35 g (1.0 mmol) of 2,2'-dithiosalicyl chloride in 20 mL DCM was slowly added to the flask contained 0.23 g (2.1 mmol) 3-picolylamine in an ice bath. After 30 mins, 1.0 mL NEt<sub>3</sub> was added to the above solution, and the solution was stirred for further 12 hrs. The resulting solution was washed with 50 mL H<sub>2</sub>O three times, and the organic layer was collected, dried over with anhydrous MgSO<sub>4</sub> and filtrated. The solvent of the filtrate was removed by vacuum system to obtain the white solid 0.32 g (Yield: 66%). <sup>1</sup>H NMR (DMSO-d<sub>6</sub>): 9.28 (t, *J* = 5.6 Hz, 2H), 8.60 (s, 2H), 8.48 (d, *J* = 3.2 Hz, 2H), 7.78 (d, *J* = 6.9 Hz, 2H), 7.70 (d, *J* = 7.1 Hz, 2H), 7.63 (d, *J* = 8.0 Hz, 2H), 7.44 (t, *J* = 7.5 Hz, 2H), 7.39 (t, *J* = 5.2 Hz, 2H), 7.31 (t, *J* = 6.2 Hz, 2H), 4.52 (d, *J* = 5.1 Hz, 4H). <sup>13</sup>C NMR: 167.17, 148.87, 148.28, 136.85, 135.29, 134.85, 133.53, 131.43, 128.10, 126.22, 125.91, 123.66, 40.52. IR (KBr): 3266 (br, ν<sub>NH</sub>), 1635 (s, ν<sub>C=O</sub>) cm<sup>-1</sup>. EA: C: 64.18, H: 4.56, N: 11.51; found: C: 63.87, H: 4.66, N: 11.86.

### Synthesis of 2,2'-dithiobis[N-(4-pyridinylmethyl)]benzamide (2o)

The solution of 0.35 g (1.0 mmol) of 2,2'-dithiosalicyl chloride in 20 mL DCM was slowly added to the flask contained 0.23 g (2.1 mmol) 4-picolylamine in an ice bath. After 30 mins, 1.0 mL NEt<sub>3</sub> was added to the above solution, and the solution was stirred for further 12 hrs. The resulting solution was washed with 50 mL H<sub>2</sub>O three times, and the organic layer was collected, dried over with anhydrous MgSO<sub>4</sub> and filtrated. The solvent of the filtrate was removed by vacuum system to obtain the white solid 0.31g (Yield: 64%). <sup>1</sup>H NMR (DMSO-d<sub>6</sub>): 9.31 (t, *J* = 5.1 Hz, 2H), 8.52 (d, *J* = 5.0 Hz, 4H), 7.76 (d, *J* = 7.2 Hz, 2H), 7.65 (d, *J* = 7.9 Hz, 2H), 7.48 (t, *J* = 7.4 Hz, 2H), 7.36 (m, 6H), 4.52 (d, *J* = 5.7 Hz, 4H). <sup>13</sup>C NMR: 167.36, 149.65, 148.38, 136.96, 133.44, 131.53, 128.20, 126.31, 125.97, 122.31, 41.86. IR (KBr): 3287 (br, ν<sub>NH</sub>), 1639 (s, ν<sub>C=O</sub>) cm<sup>-1</sup>. EA: C: 64.18, H: 4.56, N: 11.51; found: C: 64.12, H: 4.30, N: 11.89.

### Synthesis of 2,2'-dithiobis[N-(2-propenyl)]benzamide (2p)

The solution of 0.72 g (2.1 mmol) of 2,2'-dithiosalicyl chloride in 20 mL DCM was slowly added to the flask contained 0.24 g (4.2 mmol) allylamine in an ice bath. After 30 mins, 1.0 mL NEt<sub>3</sub> was added to the above solution, and the solution was stirred for further 12 hrs. The resulting solution was washed with 50 mL H<sub>2</sub>O three times, and the organic layer was collected, dried over with anhydrous MgSO<sub>4</sub> and filtrated. The solvent of the filtrate was removed by vacuum system to obtain the yellow solid 0.45 g (Yield: 56%). <sup>1</sup>H NMR (DMSO-d<sub>6</sub>): 8.85 (t, *J* = 5.6 Hz, 2H), 7.69 (d, *J* = 7.6 Hz, 2H), 7.65 (d, *J* = 8.1 Hz, 2H), 7.46 (t, *J* = 7.3 Hz, 2H), 7.30 (t, *J* = 7.4 Hz, 2H), 5.92 (m, 2H), 5.24 (dd, *J* = 17.2 and 1.4 Hz, 2H), 5.13 (dd, *J* = 10.2 and 1.2 Hz, 2H), 3.92 (t, *J* = 5.2 Hz, 4H). <sup>13</sup>C NMR: 166.75, 136.15, 135.04, 133.75, 131.15, 127.99, 126.01, 125.71, 115.36, 41.49.

### Synthesis of 2,2'-dithiobis[N-(2-propynyl)]benzamide (2q)

The solution of 0.35 g (1.0 mmol) of 2,2'-dithiosalicyl chloride in 20 mL DCM was slowly added to the flask contained 0.12 g (2.2 mmol) 2-propynylamine in an ice bath. After 30 mins, 0.5 mL NEt<sub>3</sub> was added to the above solution, and the solution was stirred for further 16 hrs. The precipitate of the resulting solution was filtrated, washed with 50 mL H<sub>2</sub>O three times and 20 mL DCM twice, and then it was dried under vacuum to obtain the light yellow product 0.32 g (Yield: 84%). <sup>1</sup>H NMR (DMSO-d<sub>6</sub>): 9.13 (t, *J* = 5.5 Hz, 2H), 7.67 (d, *J* = 7.8 Hz, 2H), 7.64 (d, *J* = 8.2 Hz, 2H), 7.48 (t, *J* = 7.6 Hz, 2H), 7.31 (t, *J* = 7.4 Hz, 2H), 4.08 (dd, *J* = 5.3 and 2.3 Hz, 4H), 3.20 (t, *J* = 2.3 Hz, 2H). <sup>13</sup>C NMR: 166.59, 137.01, 132.84, 131.54, 128.14, 126.06, 125.80, 80.96, 73.25, 28.57.

### Characterization of 2-(2-hydroxyphenyl)-1,2-benzisothiazol-3(2H)-one (3d)

<sup>1</sup>H NMR (DMSO-d<sub>6</sub>): 9.98 (s, 1H), 7.98 (d, *J* = 8.0 Hz, 1H), 7.92 (d, *J* = 7.8 Hz, 1H), 7.73 (t, *J* = 7.4 Hz, 1H), 7.48 (t, *J* = 7.6 Hz, 1H), 7.33 (d, *J* = 7.7 Hz, 2H), 7.30 (t, *J* = 7.3 Hz, 1H), 7.01 (d, *J* = 8.2 Hz, 1H), 6.91 (t, *J* = 7.5 Hz, 1H). <sup>13</sup>C NMR: 164.03, 154.14, 141.56, 132.07, 130.23, 130.13, 125.94, 125.45, 123.64, 123.03, 121.64, 119.25, 116.88. IR (KBr): 3224 (br, ν<sub>O-H</sub>), 1643(s, ν<sub>C=O</sub>) cm<sup>-1</sup>. EA: C: 64.18, H: 3.73, N: 5.76; found: C: 64.21, H: 3.70, N: 5.94. HRMS m/z calcd for C<sub>13</sub>H<sub>10</sub>O<sub>2</sub>NS [M+H]<sup>+</sup>: 244.0421; found: 244.0427.

### Characterization of 2-(2-tetrahydrofuran-2-ylmethyl)-1,2-benzisothiazol-3(2H)-one (3f)

<sup>1</sup>H NMR (DMSO-d<sub>6</sub>): 7.94 (d, *J* = 8.1 Hz, 1H), 7.87 (d, *J* = 7.8 Hz, 1H), 7.67 (t, *J* = 7.4 Hz, 1H), 7.42 (t, *J* = 7.4 Hz, 1H), 4.11 (quin, *J* = 4.9 Hz, 1H), 3.92 (m, *J* = Hz, 2H), 3.79 (q, *J* = 7.1 Hz, 1H), 3.66 (q, *J* = 7.1 Hz, 1H), 1.94 (sext, *J* = 5.9 Hz, 1H), 1.79 (quin, *J* = 6.9 Hz, 2H), 1.55 (sext, *J* = 7.6 Hz, 1H). <sup>13</sup>C NMR: 164.74, 141.31, 131.78, 125.58, 125.31, 123.54, 121.53, 77.01, 67.45, 46.67, 28.00, 25.31. IR (KBr): 1654(s, ν<sub>C=O</sub>) cm<sup>-1</sup>. EA: C: 61.25, H: 5.95, N: 5.57; found: C: 60.85, H: 5.78, N: 5.17. HRMS m/z calcd for C<sub>12</sub>H<sub>14</sub>O<sub>2</sub>NS [M+H]<sup>+</sup>: 236.0740; found: 236.0749.

### Characterization of 2-[2-(2-cyclohexenyl)ethyl]-1,2-benzisothiazol-3(2H)-one (3g)

<sup>1</sup>H NMR (DMSO-d<sub>6</sub>): 7.95 (d, *J* = 7.7 Hz, 1H), 7.85 (d, *J* = 7.6 Hz, 1H), 7.67 (t, *J* = 7.1 Hz, 1H), 7.42 (t, *J* = 7.4 Hz, 1H), 5.38 (s, 1H), 3.89 (t, *J* = 6.5 Hz, 2H), 2.28 (t, *J* = 5.5 Hz, 2H), 1.97 (m, 2H), 1.84 (m, 2H), 1.56

(sext,  $J = 4.0$  Hz, 2H), 1.46 (sext,  $J = 4.4$  Hz, 2H).  $^{13}\text{C}$  NMR: 164.17, 140.36, 133.80, 131.65, 125.49, 125.36, 124.10, 122.98, 121.73, 41.51, 37.13, 27.53, 24.69, 22.32, 21.76. IR (KBr): 1653(s,  $\nu_{\text{C=O}}$ )  $\text{cm}^{-1}$ . EA: C: 69.46, H: 6.61, N: 5.40; found: C: 69.71, H: 6.58, N: 5.36. HRMS  $m/z$  calcd for  $\text{C}_{15}\text{H}_{18}\text{ONS}$   $[\text{M}+\text{H}]^+$ : 260.1113; found: 260.1104.

#### Characterization of 2-[N-(2-(dimethylamino)ethyl)]-1,2-benzisothiazol-3(2H)-one (3i)

$^1\text{H}$  NMR (DMSO- $d_6$ ): 7.94 (d,  $J = 8.1$  Hz, 1H), 7.85 (d,  $J = 7.8$  Hz, 1H), 7.66 (t,  $J = 7.8$  Hz, 1H), 7.41 (t,  $J = 7.7$  Hz, 1H), 3.91 (t,  $J = 5.9$  Hz, 2H), 2.53 (t,  $J = 5.8$  Hz, 2H), 2.21 (s, 6H).  $^{13}\text{C}$  NMR: 164.45, 141.40, 131.63, 125.46, 125.27, 123.91, 121.62, 57.81, 45.00, 40.83. IR (KBr): 1652(s,  $\nu_{\text{C=O}}$ )  $\text{cm}^{-1}$ .

#### Characterization of 2-(2-chloroethyl)-1,2-benzisothiazol-3(2H)-one (3j)

$^1\text{H}$  NMR (DMSO- $d_6$ ): 8.00 (d,  $J = 8.1$  Hz, 1H), 7.88 (d,  $J = 7.7$  Hz, 1H), 7.69 (t,  $J = 7.1$  Hz, 1H), 7.44 (t,  $J = 7.2$  Hz, 1H), 4.18 (t,  $J = 5.8$  Hz, 1H), 3.92 (t,  $J = 5.8$  Hz, 2H).  $^{13}\text{C}$  NMR: 164.72, 140.89, 132.05, 125.67, 125.57, 123.65, 123.97, 44.82, 43.00. IR (KBr): 1672(s,  $\nu_{\text{C=O}}$ )  $\text{cm}^{-1}$ . EA: C: 50.59, H: 3.77, N: 6.56; found: C: 50.64, H: 3.75, N: 6.19. HRMS  $m/z$  calcd for  $\text{C}_9\text{H}_9\text{ONClS}$   $[\text{M}+\text{H}]^+$ : 214.0081; found: 214.0088.

#### Characterization of 2-(2-methoxyethyl)-1,2-benzisothiazol-3(2H)-one (3k)

$^1\text{H}$  NMR (DMSO- $d_6$ ): 7.96 (d,  $J = 8.1$  Hz, 1H), 7.86 (d,  $J = 7.8$  Hz, 1H), 7.67 (t,  $J = 7.3$  Hz, 1H), 7.42 (t,  $J = 7.3$  Hz, 1H), 3.99 (t,  $J = 5.2$  Hz, 2H), 3.59 (t,  $J = 5.1$  Hz, 2H), 3.28 (s, 3H).  $^{13}\text{C}$  NMR: 184.49, 141.01, 131.81, 125.57, 125.42, 123.80, 121.73, 70.34, 58.08, 42.85. IR (KBr): 1652(s,  $\nu_{\text{C=O}}$ )  $\text{cm}^{-1}$ . EA: C: 57.40, H: 5.30, N: 6.69; found: C: 57.41, H: 4.99, N: 6.41.

#### Characterization of 2-(3-pyridinylmethyl)-1,2-benzisothiazol-3(2H)-one (3n)

$^1\text{H}$  NMR (DMSO- $d_6$ ): 8.59 (s, 1H), 8.51 (d,  $J = 4.7$  Hz, 1H), 7.95 (d,  $J = 8.7$  Hz, 1H), 7.91 (d,  $J = 8.6$  Hz, 1H), 7.68 (m, 2H), 7.41 (m, 2H), 5.08 (s,  $J =$  Hz, 2H).  $^{13}\text{C}$  NMR: 164.73, 149.30, 149.22, 140.72, 136.04, 132.82, 132.24, 125.94, 125.86, 124.00, 123.89, 122.17, 44.09. IR (KBr): 1647 (s,  $\nu_{\text{C=O}}$ )  $\text{cm}^{-1}$ .

#### Characterization of 2-(4-pyridinylmethyl)-1,2-benzisothiazol-3(2H)-one (3o)

$^1\text{H}$  NMR (DMSO- $d_6$ ): 8.54 (d,  $J = 6.2$  Hz, 2H), 8.00 (d,  $J = 8.1$  Hz, 1H), 7.92 (d,  $J = 7.8$  Hz, 1H), 7.70 (t,  $J = 8.0$  Hz, 1H), 7.46 (t,  $J = 7.6$  Hz, 1H), 7.25 (d,  $J = 4.3$  Hz, 2H), 5.09 (s, 2H).  $^{13}\text{C}$  NMR: 165.13, 150.37, 146.33, 141.17, 132.62, 126.30, 126.17, 124.03, 122.81, 122.57, 45.61. IR (KBr): 1647 (s,  $\nu_{\text{C=O}}$ )  $\text{cm}^{-1}$ .

#### Synthesis of complex 4

Complex 1 (0.06 g, 0.1 mmol) and  $\text{ONMe}_3$  (0.008 g, 0.1 mmol) were dissolved in 5 mL DMF, and the solution was stirred for 1 hour. Then, 45 mL ether was added to the solution to form precipitates. The precipitates were collected and dried under the vacuum system. The residue was dissolved in 5 mL MeCN and layered by 40 mL ether slowly, and the dark green crystals 0.02 g (0.03 mmol) was obtained at  $-20^\circ\text{C}$  for 2 weeks (Crystal yield: 33%). IR (KBr): 1607, 1580 (s,  $\nu_{\text{C=O}}$ ), 1023 (s,  $\nu_{\text{S=O}}$ )  $\text{cm}^{-1}$ . HRMS  $m/z$  calcd for  $\text{C}_{26}\text{H}_{20}\text{O}_3\text{N}_4\text{FeS}_2$   $[\text{M}]$ : 556.0321; found: 556.0332. EPR (MeCN, 77K): 2.12.

### **The experiment for the catalysis of S-N bond formation by the ionic source with molecular oxygen**

In the glove-box, a mixture of 2.5 (1, 5 or 10) mol% of ionic source (complex **1** or FeCl<sub>3</sub>) and the disulfide substrate were loaded to the 50 mL flask and dissolved in THF/MeCN (1:1) (or DMF). The mixed solution was stirred for 24 or 48 hrs under O<sub>2</sub> atmosphere. The resulting solution was dried under vacuum, and the residues were dissolved in DMSO-d<sub>6</sub> to conduct the <sup>1</sup>H NMR experiment without further purification.

### **The experiment for the catalysis of S-N bond formation by the ionic source with ONMe<sub>3</sub>**

In the glove-box, a mixture of 2.5 (1, 5 or 10) mol% of ionic source (complex **1** or FeCl<sub>3</sub>), the disulfide substrate and 5 fold of ONMe<sub>3</sub> were loaded to the 50 mL flask and dissolved in THF/MeCN (1:1) (or DMF). The mixed solution was stirred for 24 hrs in the closed system. The resulting solution was dried under vacuum, and the residues were dissolved in DMSO-d<sub>6</sub> to conduct the <sup>1</sup>H NMR experiment without further purification.

### ***In situ* NMR experiment for the oxidation of PPh<sub>3</sub> with ONMe<sub>3</sub>**

In the glove-box, a mixture of 1 equiv. of PPh<sub>3</sub> and 1 equiv. of ONMe<sub>3</sub> in DMSO-d<sub>6</sub> (400 μL) was transferred to a J. Young NMR tube which conducted the *in situ* NMR experiment.

### ***In situ* NMR experiment for the oxidation of PPh<sub>3</sub> by complex **1** or FeCl<sub>3</sub> with ONMe<sub>3</sub>**

In the glove-box, a mixture of 1 equiv. of complex **1** (or FeCl<sub>3</sub>), 2 equiv. of PPh<sub>3</sub> and 2 equiv. of ONMe<sub>3</sub> in DMSO-d<sub>6</sub> (400 μL) was transferred to a J. Young NMR tube which conducted the *in situ* NMR experiment.

### ***In situ* NMR experiment for the oxidation of PPh<sub>3</sub> by complex **1** with O<sub>2</sub>**

In the glove-box, a mixture of 1 equiv. of complex **1** and 2 equiv. of PPh<sub>3</sub> in DMSO-d<sub>6</sub> (400 μL) was transferred to a J. Young NMR tube. Then, the NMR tube was purged with O<sub>2</sub> for 10 seconds, and the tube was conducted the *in situ* NMR experiment after 24 hrs.

### ***In situ* NMR experiment for the reactivity of complex **4** with the disulfide substrates or PPh<sub>3</sub>**

In the glove-box, a mixture of complex **4** and 4 fold of substrate **2a**, **2b** or PPh<sub>3</sub> in DMSO-d<sub>6</sub> (400 μL) was transferred to a J. Young NMR tube. The NMR tube was conducted the *in situ* NMR experiment after 24 hrs.



## Supplementary Tables and Figures

**Table S1.** The summary of crystallographic data for the organic substrates (**2b**, **2c**, **2e**, **2f**).

|                                                                                                                                          | <b>2b</b>          | <b>2c</b>          | <b>2e</b>          | <b>2f</b>                                     |
|------------------------------------------------------------------------------------------------------------------------------------------|--------------------|--------------------|--------------------|-----------------------------------------------|
| formula                                                                                                                                  | C28H24N2O2S2       | C22H28N2O2S2       | C28H24N2O4S2       | C24H28N2O4S2                                  |
| fw                                                                                                                                       | 484.61             | 416.58             | 516.61             | 472.60                                        |
| temp, K                                                                                                                                  | 296(2) K           | 150(2) K           | 150(2)             | 150(2)                                        |
| cryst syst                                                                                                                               | Monoclinic         | Triclinic          | Monoclinic         | Orthorhombic                                  |
| space group                                                                                                                              | P2 <sub>1</sub> /n | P-1                | C2/c               | P2 <sub>1</sub> 2 <sub>1</sub> 2 <sub>1</sub> |
| <i>a</i> , Å                                                                                                                             | 7.927(2)           | 11.2697(11)        | 11.532(2)          | 7.8446(2)                                     |
| <i>b</i> , Å                                                                                                                             | 18.115(5)          | 13.9696(13)        | 10.4494(19)        | 15.3529(4)                                    |
| <i>c</i> , Å                                                                                                                             | 16.886(5)          | 15.8362(14)        | 20.496(4)          | 18.7689(5)                                    |
| $\alpha$ , °                                                                                                                             | 90                 | 113.646(6)         | 90                 | 90                                            |
| $\beta$ , °                                                                                                                              | 95.357(16)         | 92.993(6)          | 97.173(12)         | 90                                            |
| $\gamma$ , °                                                                                                                             | 90                 | 100.554(6)         | 90                 | 90                                            |
| Volume, Å <sup>3</sup> / <i>Z</i>                                                                                                        | 2414.1(12) / 4     | 2223.2(4) / 4      | 2450.4(7) / 4      | 2260.48(10) / 4                               |
| Density (cald.),<br>Mg/m <sup>3</sup>                                                                                                    | 1.333              | 1.245              | 1.400              | 1.389                                         |
| Absorption<br>coefficient, mm <sup>-1</sup>                                                                                              | 0.249              | 0.259              | 0.256              | 0.270                                         |
| crystal size, mm                                                                                                                         | 0.20 x 0.12 x 0.08 | 0.12 x 0.08 x 0.08 | 0.10 x 0.10 x 0.10 | 0.12 x 0.10 x 0.08                            |
| $\theta$ range, deg                                                                                                                      | 2.42 to 28.29      | 1.418 to 28.280    | 2.00 to 28.28      | 1.71 to 28.82                                 |
| no. of reflns<br>collected                                                                                                               | 30128              | 25532              | 14783              | 31168                                         |
| no. of indep reflns                                                                                                                      | 5971               | 10716              | 3032               | 5592                                          |
| max. and min. trans                                                                                                                      | 0.982 and 0.960    | 0.978 and 0.967    | 0.9582 and 0.9582  | 0.973 and 0.959                               |
| no. of data<br>/restraints /params                                                                                                       | 5971 / 0 / 307     | 10716 / 0 / 517    | 3030 / 0 / 164     | 5592 / 0 / 344                                |
| goodness-of-fit on<br><i>F</i> <sup>2</sup>                                                                                              | 0.732              | 0.921              | 1.164              | 0.898                                         |
| final <i>R</i> indices<br>[ <i>I</i> > 2 $\sigma$ ( <i>I</i> )] <i>R</i> <sub>1</sub> <sup>a</sup> , <i>wR</i> <sub>2</sub> <sup>b</sup> | 0.0392, 0.1059     | 0.0476, 0.1166     | 0.0573, 0.1648     | 0.0441, 0.1182                                |
| <i>R</i> indices (all data),<br><i>R</i> <sub>1</sub> <sup>a</sup> , <i>wR</i> <sub>2</sub> <sup>b</sup>                                 | 0.0778, 0.1434     | 0.0914, 0.1428     | 0.0782, 0.1798     | 0.0553, 0.1277                                |
| largest diff. peak<br>and hole, e Å <sup>-3</sup>                                                                                        | 0.286 and -0.402   | 0.312 and -0.331   | 0.407 and -0.386   | 0.255 and -0.509                              |

$$^a R_I = \frac{\sum |F_0| - |F_c|}{\sum |F_0|}$$

$$^b wR_2 = \left[ \frac{\sum [\omega(F_0^2 - F_c^2)^2]}{\sum [\omega(F_0^2)^2]} \right]^{1/2}$$

**Table S2.** The summary of crystallographic data for the organic substrates (**2i**, **2j**, **2n**, **2o**).

|                                                                                                                                                        | <b>2i</b>          | <b>2j</b>          | <b>2n</b>          | <b>2o</b>          |
|--------------------------------------------------------------------------------------------------------------------------------------------------------|--------------------|--------------------|--------------------|--------------------|
| formula                                                                                                                                                | C22H30N4O2S2       | C18H18Cl2N2O2S2    | C27H26N4O3S2       | C26H33N4O2S2       |
| fw                                                                                                                                                     | 446.62             | 429.36             | 518.64             | 486.59             |
| temp, K                                                                                                                                                | 150(2)             | 150(2)             | 150(2)             | 150(2)             |
| cryst syst                                                                                                                                             | Monoclinic         | Monoclinic         | Triclinic          | Orthorhombic       |
| space group                                                                                                                                            | P2 <sub>1</sub> /n | P2 <sub>1</sub> /n | P-1                | Pna2 <sub>1</sub>  |
| <i>a</i> , Å                                                                                                                                           | 7.767(3)           | 10.7004(4)         | 8.9627(17)         | 20.9157(11)        |
| <i>b</i> , Å                                                                                                                                           | 19.185(6)          | 18.5647(4)         | 9.6003(15)         | 4.9145(3)          |
| <i>c</i> , Å                                                                                                                                           | 15.494(5)          | 11.2176(2)         | 15.312(3)          | 23.0352(13)        |
| $\alpha$ , °                                                                                                                                           | 90                 | 90                 | 101.184(13)        | 90                 |
| $\beta$ , °                                                                                                                                            | 97.481(6)          | 118.2724(12)       | 95.225(12)         | 90                 |
| $\gamma$ , °                                                                                                                                           | 90                 | 90                 | 101.995(12)        | 90                 |
| Volume, Å <sup>3</sup> / Z                                                                                                                             | 2289.0(13) / 4     | 1962.54(7) / 4     | 1252.4(4) / 2      | 2367.8(2) / 4      |
| Density (cald.),<br>Mg/m <sup>3</sup>                                                                                                                  | 1.296              | 1.453              | 1.375              | 1.365              |
| Absorption<br>coefficient, mm <sup>-1</sup>                                                                                                            | 0.258              | 0.559              | 0.250              | 0.257              |
| crystal size, mm                                                                                                                                       | 0.12 x 0.04 x 0.01 | 0.15 x 0.12 x 0.10 | 0.20 x 0.04 x 0.04 | 0.35 x 0.12 x 0.06 |
| $\theta$ range, deg                                                                                                                                    | 2.123 to 28.790    | 2.17 to 28.73      | 2.222 to 26.000    | 1.768 to 28.718    |
| no. of reflns<br>collected                                                                                                                             | 14771              | 29522              | 13798              | 25741              |
| no. of indep reflns                                                                                                                                    | 5928               | 5089               | 4890               | 5762               |
| max. and min. trans                                                                                                                                    | 0.996 and 0.958    | 0.946 and 0.921    | 0.994 and 0.970    | 0.985 and 0.915    |
| no. of data<br>/restraints /params                                                                                                                     | 5928 / 0 / 283     | 5089 / 0 / 254     | 4890 / 0 / 335     | 5762 / 1 / 307     |
| goodness-of-fit on<br><i>F</i> <sup>2</sup>                                                                                                            | 0.887              | 1.115              | 0.928              | 1.005              |
| final <i>R</i> indices<br>[ <i>I</i> > 2 $\sigma$ ( <i>I</i> )] <i>R</i> <sub>1</sub> <sup><i>a</i></sup> , <i>wR</i> <sub>2</sub> <sup><i>b</i></sup> | 0.0630, 0.1434     | 0.0426, 0.1379     | 0.0703, 0.1596     | 0.0605, 0.1421     |
| <i>R</i> indices (all data),<br><i>R</i> <sub>1</sub> <sup><i>a</i></sup> , <i>wR</i> <sub>2</sub> <sup><i>b</i></sup>                                 | 0.1396, 0.1964     | 0.0546, 0.1512     | 0.1499, 0.2096     | 0.0812, 0.1554     |
| largest diff. peak<br>and hole, e Å <sup>-3</sup>                                                                                                      | 0.323 and -0.397   | 0.793 and -0.661   | 0.300 and -0.436   | 1.210 and -0.376   |

$$^a R_1 = \frac{\sum |F_0| - |F_c|}{\sum |F_0|}$$

$$^b wR_2 = \left[ \frac{\sum [\omega(F_0^2 - F_c^2)^2]}{\sum [\omega(F_0^2)^2]} \right]^{1/2}$$

**Table S3.** The summary of crystallographic data for the organic substrates (**2p**, **2q**, **2r**) and product (**3b**).

|                                                                                                                                          | <b>2p</b>          | <b>2q</b>          | <b>2r</b>          | <b>3b</b>              |
|------------------------------------------------------------------------------------------------------------------------------------------|--------------------|--------------------|--------------------|------------------------|
| formula                                                                                                                                  | C20H20N2O2S2       | C23H23N3O3S2       | C26H20N2O2S2       | C14H11NOS              |
| fw                                                                                                                                       | 384.50             | 453.56             | 456.56             | 241.30                 |
| temp, K                                                                                                                                  | 150(2)             | 150(2)             | 150(2)             | 296(2) K               |
| cryst syst                                                                                                                               | Monoclinic         | Monoclinic         | Monoclinic         | Monoclinic             |
| space group                                                                                                                              | Pn                 | P2 <sub>1</sub> /c | C2/c               | P2 <sub>1</sub> /c     |
| <i>a</i> , Å                                                                                                                             | 9.0934(7)          | 11.755(16)         | 24.2458(18)        | 9.6442(4)              |
| <i>b</i> , Å                                                                                                                             | 11.9605(10)        | 7.717(10)          | 5.0506(4)          | 6.3275(2)              |
| <i>c</i> , Å                                                                                                                             | 17.7211(15)        | 24.95(3)           | 18.4959(14)        | 19.5922(7)             |
| $\alpha$ , °                                                                                                                             | 90                 | 90                 | 90                 | 90                     |
| $\beta$ , °                                                                                                                              | 95.805(5)          | 93.228(17)         | 110.246(5)         | 96.247(2) <sup>o</sup> |
| $\gamma$ , °                                                                                                                             | 90                 | 90                 | 90                 | 90                     |
| Volume, Å <sup>3</sup> / <i>Z</i>                                                                                                        | 1917.5(3) / 4      | 2259(5) / 4        | 2125.0(3) / 4      | 1188.49(8) / 4         |
| Density (cald.),<br>Mg/m <sup>3</sup>                                                                                                    | 1.332              | 1.333              | 1.427              | 1.349                  |
| Absorption<br>coefficient, mm <sup>-1</sup>                                                                                              | 0.294              | 0.265              | 0.279              | 0.253                  |
| crystal size, mm                                                                                                                         | 0.23 x 0.10 x 0.02 | 0.12 x 0.04 x 0.02 | 0.25 x 0.04 x 0.02 | 0.15 x 0.12 x 0.08     |
| $\theta$ range, deg                                                                                                                      | 1.703 to 28.856    | 2.451 to 24.980    | 1.790 to 28.729    | 3.14 to 28.78          |
| no. of reflns<br>collected                                                                                                               | 23980              | 15094              | 10641              | 11850                  |
| no. of indep reflns                                                                                                                      | 8693               | 3962               | 2722               | 3079                   |
| max. and min.<br>trans                                                                                                                   | 0.994 and 0.935    | 0.993 and 0.959    | 0.994 and 0.934    | 0.982 and 0.960        |
| no. of data<br>/restraints /params                                                                                                       | 8693 / 2 / 469     | 3962 / 0 / 282     | 2722 / 0 / 149     | 3079 / 0 / 154         |
| goodness-of-fit on<br><i>F</i> <sup>2</sup>                                                                                              | 0.925              | 1.177              | 0.801              | 0.722                  |
| final <i>R</i> indices<br>[ <i>I</i> > 2 $\sigma$ ( <i>I</i> )] <i>R</i> <sub>1</sub> <sup>a</sup> , <i>wR</i> <sub>2</sub> <sup>b</sup> | 0.0589, 0.1410     | 0.0982, 0.2295     | 0.0466, 0.1162     | 0.0432, 0.1225         |
| <i>R</i> indices (all<br>data), <i>R</i> <sub>1</sub> <sup>a</sup> , <i>wR</i> <sub>2</sub> <sup>b</sup>                                 | 0.0789, 0.1569     | 0.1613, 0.2685     | 0.0880, 0.1437     | 0.0654, 0.1469         |
| largest diff. peak<br>and hole, e Å <sup>-3</sup>                                                                                        | 1.261 and -0.515   | 0.814 and -0.743   | 0.266 and -0.357   | 0.294 and -0.312       |

$$^a R_1 = \frac{\sum |F_0| - |F_c|}{\sum |F_0|}$$

$$^b wR_2 = \left[ \frac{\sum [\omega(F_0^2 - F_c^2)^2]}{\sum [\omega(F_0^2)^2]} \right]^{1/2}$$

**Table S4.** The summary of crystallographic data for the organic products (**3d**, **3e**, **3h**, **3j**).

|                                                                                                                                                        | <b>3d</b>          | <b>3e</b>          | <b>3h</b>          | <b>3j</b>          |
|--------------------------------------------------------------------------------------------------------------------------------------------------------|--------------------|--------------------|--------------------|--------------------|
| formula                                                                                                                                                | C13H9NO2S          | C14H11NO2S         | C9H9NO2S           | C9H8ClNO2S         |
| fw                                                                                                                                                     | 243.27             | 257.30             | 195.23             | 213.67             |
| temp, K                                                                                                                                                | 150(2)             | 150(2)             | 150(2)             | 150(2)             |
| cryst syst                                                                                                                                             | Monoclinic         | Hexagonal          | Monoclinic         | Monoclinic         |
| space group                                                                                                                                            | Cc                 | P6 <sub>1</sub> 22 | Pn                 | P2 <sub>1</sub> /n |
| <i>a</i> , Å                                                                                                                                           | 8.2595(4)          | 8.2970(4)          | 10.5437(4)         | 4.2898(4)          |
| <i>b</i> , Å                                                                                                                                           | 18.2546(8)         | 8.2970(4)          | 7.8373(3)          | 10.1017(9)         |
| <i>c</i> , Å                                                                                                                                           | 7.3234(4)          | 59.074(3)          | 10.7574(4)         | 21.2306(19)        |
| $\alpha$ , °                                                                                                                                           | 90                 | 90                 | 90                 | 90                 |
| $\beta$ , °                                                                                                                                            | 102.049(4)         | 90                 | 103.0875(18)       | 92.654(7)          |
| $\gamma$ , °                                                                                                                                           | 90                 | 120                | 90                 | 90                 |
| Volume, Å <sup>3</sup> / <i>Z</i>                                                                                                                      | 1079.85(9) / 4     | 3521.8(3) / 12     | 865.84(6) / 4      | 919.03(14) / 4     |
| Density (cald.),<br>Mg/m <sup>3</sup>                                                                                                                  | 1.496              | 1.456              | 1.498              | 1.544              |
| Absorption<br>coefficient, mm <sup>-1</sup>                                                                                                            | 0.286              | 0.267              | 0.335              | 0.597              |
| crystal size, mm                                                                                                                                       | 0.09 x 0.03 x 0.03 | 0.12 x 0.10 x 0.08 | 0.35 x 0.20 x 0.04 | 0.12 x 0.02 x 0.02 |
| $\theta$ range, deg                                                                                                                                    | 2.23 to 28.27      | 2.07 to 28.74      | 2.442 to 28.781    | 2.233 to 28.720    |
| no. of reflns<br>collected                                                                                                                             | 6179               | 50743              | 11299              | 12819              |
| no. of indep reflns                                                                                                                                    | 2582               | 3063               | 3902               | 2371               |
| max. and min. trans                                                                                                                                    | 0.9915 and 0.9747  | 0.9651 and 0.9483  | 0.988 and 0.901    | 0.988 and 0.932    |
| no. of data<br>/restraints /params                                                                                                                     | 2582 / 2 / 158     | 3063 / 0 / 164     | 3902 / 2 / 237     | 2371 / 0 / 118     |
| goodness-of-fit on<br><i>F</i> <sup>2</sup>                                                                                                            | 0.810              | 0.601              | 0.657              | 0.940              |
| final <i>R</i> indices<br>[ <i>I</i> > 2 $\sigma$ ( <i>I</i> )] <i>R</i> <sub>1</sub> <sup><i>a</i></sup> , <i>wR</i> <sub>2</sub> <sup><i>b</i></sup> | 0.0453, 0.1145     | 0.0464, 0.1515     | 0.0265, 0.0771     | 0.0460, 0.1228     |
| <i>R</i> indices (all data),<br><i>R</i> <sub>1</sub> <sup><i>a</i></sup> , <i>wR</i> <sub>2</sub> <sup><i>b</i></sup>                                 | 0.0775, 0.1397     | 0.0507, 0.1583     | 0.0280, 0.0815     | 0.0741, 0.1529     |
| largest diff. peak<br>and hole, e Å <sup>-3</sup>                                                                                                      | 0.177 and -0.269   | 0.214 and -0.457   | 0.234 and -0.225   | 0.393 and -0.49    |

$$^a R_1 = \frac{\sum |F_0| - |F_c|}{\sum |F_0|}$$

$$^b wR_2 = \left[ \frac{\sum [\omega(F_0^2 - F_c^2)^2]}{\sum [\omega(F_0^2)^2]} \right]^{1/2}$$

**Table S5.** The summary of crystallographic data for the organic products (**3l**, **3n**, **3q**, **3r**).

|                                                                                                                                                        | <b>3l</b>          | <b>3n</b>          | <b>3q</b>          | <b>3r</b>           |
|--------------------------------------------------------------------------------------------------------------------------------------------------------|--------------------|--------------------|--------------------|---------------------|
| formula                                                                                                                                                | C10H9NO3S          | C13H10N2OS         | C10H7NOS           | C13H10NOS           |
| fw                                                                                                                                                     | 223.24             | 242.29             | 189.23             | 227.27              |
| temp, K                                                                                                                                                | 150(2)             | 150(2)             | 150(2)             | 150(2)              |
| cryst syst                                                                                                                                             | Monoclinic         | Triclinic          | Monoclinic         | Monoclinic          |
| space group                                                                                                                                            | P2 <sub>1</sub> /c | P-1                | P2 <sub>1</sub> /n | P2 <sub>1</sub> /c  |
| <i>a</i> , Å                                                                                                                                           | 14.9647(9)         | 8.4192(5)          | 4.1297(3)          | 5.8819(4)           |
| <i>b</i> , Å                                                                                                                                           | 12.5644(8)         | 8.7045(5)          | 14.1058(11)        | 14.3729(9)          |
| <i>c</i> , Å                                                                                                                                           | 10.6636(6)         | 8.7097(5)          | 14.7610(11)        | 12.3134(9)          |
| $\alpha$ , °                                                                                                                                           | 90                 | 83.598(2)          | 90                 | 90                  |
| $\beta$ , °                                                                                                                                            | 93.300(3)          | 65.260(2)          | 93.338(5)          | 98.232(5)           |
| $\gamma$ , °                                                                                                                                           | 90                 | 73.566(2)          | 90                 | 90                  |
| Volume, Å <sup>3</sup> / <i>Z</i>                                                                                                                      | 2001.7(2) / 8      | 556.00(6) / 2      | 858.41(11) / 4     | 1030.25(12) / 4     |
| Density (cald.),<br>Mg/m <sup>3</sup>                                                                                                                  | 1.482              | 1.447              | 1.464              | 1.465               |
| Absorption<br>coefficient, mm <sup>-1</sup>                                                                                                            | 0.308              | 0.273              | 0.328              | 0.287               |
| crystal size, mm                                                                                                                                       | 0.35 x 0.30 x 0.28 | 0.45 x 0.38 x 0.08 | 0.12 x 0.04 x 0.02 | 0.12 x 0.08 x 0.012 |
| $\theta$ range, deg                                                                                                                                    | 2.801 to 27.875    | 2.912 to 27.886    | 1.999 to 28.802    | 2.191 to 28.733     |
| no. of reflns<br>collected                                                                                                                             | 32183              | 11550              | 11263              | 13564               |
| no. of indep reflns                                                                                                                                    | 4750               | 2639               | 2232               | 2662                |
| max. and min. trans                                                                                                                                    | 0.897 and 0.874    | 0.963 and 0.815    | 0.993 and 0.963    | 0.994 and 0.943     |
| no. of data<br>/restraints /params                                                                                                                     | 4750 / 0 / 273     | 2639 / 1 / 154     | 2232 / 0 / 118     | 2662 / 0 / 145      |
| goodness-of-fit on<br><i>F</i> <sup>2</sup>                                                                                                            | 1.240              | 0.920              | 0.933              | 0.989               |
| final <i>R</i> indices<br>[ <i>I</i> > 2 $\sigma$ ( <i>I</i> )] <i>R</i> <sub>1</sub> <sup><i>a</i></sup> , <i>wR</i> <sub>2</sub> <sup><i>b</i></sup> | 0.0424, 0.1424     | 0.0308, 0.0806     | 0.0355, 0.1157     | 0.0422, 0.1282      |
| <i>R</i> indices (all data),<br><i>R</i> <sub>1</sub> <sup><i>a</i></sup> , <i>wR</i> <sub>2</sub> <sup><i>b</i></sup>                                 | 0.0533, 0.1629     | 0.0363, 0.0886     | 0.0448, 0.1260     | 0.0590, 0.1456      |
| largest diff. peak<br>and hole, e Å <sup>-3</sup>                                                                                                      | 0.365 and -0.270   | 0.376 and -0.270   | 0.312 and -0.327   | 0.320 and -0.355    |

$$^a R_1 = \frac{\sum |F_0| - |F_c|}{\sum |F_0|}$$

$$^b wR_2 = \left[ \frac{\sum [\omega(F_0^2 - F_c^2)^2]}{\sum [\omega(F_0^2)^2]} \right]^{1/2}$$

**Table S6.** The summary of crystallographic data for complex 4.

| <b>Complex 4</b>                                                                                                                                       |                                                                               |
|--------------------------------------------------------------------------------------------------------------------------------------------------------|-------------------------------------------------------------------------------|
| formula                                                                                                                                                | C <sub>36</sub> H <sub>4</sub> FeN <sub>6</sub> O <sub>3</sub> S <sub>2</sub> |
| fw                                                                                                                                                     | 727.73                                                                        |
| temp, K                                                                                                                                                | 150(2)                                                                        |
| cryst syst                                                                                                                                             | Triclinic                                                                     |
| space group                                                                                                                                            | P-1                                                                           |
| <i>a</i> , Å                                                                                                                                           | 12.1106(7)                                                                    |
| <i>b</i> , Å                                                                                                                                           | 12.3582(6)                                                                    |
| <i>c</i> , Å                                                                                                                                           | 13.7051(8)                                                                    |
| $\alpha$ , °                                                                                                                                           | 111.532(3)                                                                    |
| $\beta$ , °                                                                                                                                            | 99.093(3)                                                                     |
| $\gamma$ , °                                                                                                                                           | 108.092(3)                                                                    |
| Volume, Å <sup>3</sup> / <i>Z</i>                                                                                                                      | 1725.74(17) / 2                                                               |
| Density (cald.),<br>Mg/m <sup>3</sup>                                                                                                                  | 1.401                                                                         |
| Absorption<br>coefficient, mm <sup>-1</sup>                                                                                                            | 0.604                                                                         |
| crystal size, mm                                                                                                                                       | 0.18 x 0.10 x 0.04                                                            |
| $\theta$ range, deg                                                                                                                                    | 1.859 to 24.998                                                               |
| no. of reflns<br>collected                                                                                                                             | 24083                                                                         |
| no. of indep reflns                                                                                                                                    | 6088                                                                          |
| max. and min. trans                                                                                                                                    | 0.958 and 0.822                                                               |
| no. of data<br>/restraints /params                                                                                                                     | 6088 / 16 / 539                                                               |
| goodness-of-fit on<br><i>F</i> <sup>2</sup>                                                                                                            | 1.002                                                                         |
| final <i>R</i> indices<br>[ <i>I</i> > 2 $\sigma$ ( <i>I</i> )] <i>R</i> <sub>1</sub> <sup><i>a</i></sup> , <i>wR</i> <sub>2</sub> <sup><i>b</i></sup> | 0.0364, 0.1177                                                                |
| <i>R</i> indices (all data),<br><i>R</i> <sub>1</sub> <sup><i>a</i></sup> , <i>wR</i> <sub>2</sub> <sup><i>b</i></sup>                                 | 0.0438, 0.1264                                                                |
| largest diff. peak<br>and hole, e Å <sup>-3</sup>                                                                                                      | 0.454 and -0.411                                                              |

$$^a R_1 = \frac{\sum |F_0| - |F_c|}{\sum |F_0|}$$

$$^b wR_2 = \frac{[\sum [\omega(F_0^2 - F_c^2)^2]]}{\sum [\omega(F_0^2)^2]}^{1/2}$$

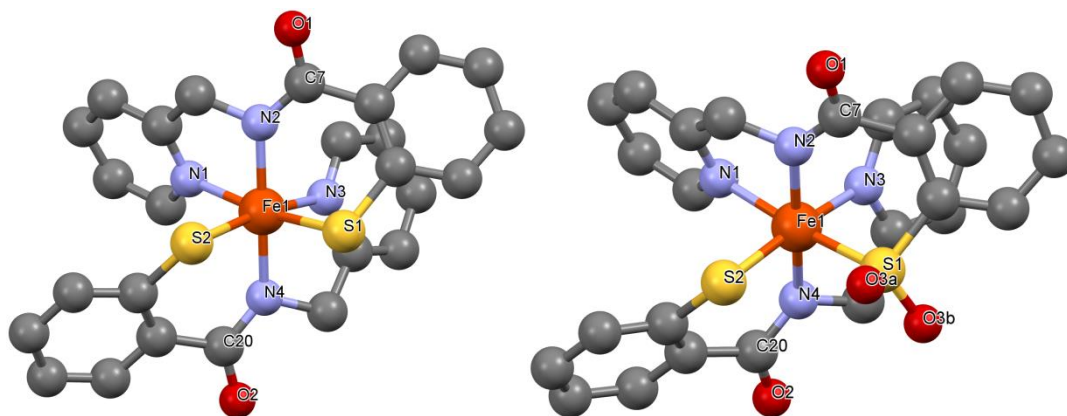

**Table S7.** The selected bond lengths and angles of complex **1** (left) and **4** (right).

|           | Complex 1  | Complex 4  |           | Complex 1  | Complex 4 |
|-----------|------------|------------|-----------|------------|-----------|
| Fe1-N1    | 2.018(5)   | 1.9994(17) | N1-Fe1-N3 | 91.99(19)  | 91.54(7)  |
| Fe1-N2    | 1.942(5)   | 1.9449(17) | N1-Fe1-N4 | 96.4(2)    | 93.74(7)  |
| Fe1-N3    | 2.002(5)   | 2.0024(18) | N1-Fe1-S1 | 170.11(16) | 172.20(5) |
| Fe1-N4    | 1.947(5)   | 1.9321(17) | N1-Fe1-S2 | 89.77(14)  | 90.37(5)  |
| Fe1-S1    | 2.2641(18) | 2.2294(6)  | N2-Fe1-N3 | 95.6(2)    | 93.93(7)  |
| Fe1-S2    | 2.2650(18) | 2.2302(7)  | N2-Fe1-N4 | 174.4(2)   | 173.43(8) |
| S1-O3A    | n.d.       | 1.419(3)   | N2-Fe1-S1 | 90.46(15)  | 90.67(5)  |
| S1-O3B    | n.d.       | 1.490(3)   | N2-Fe1-S2 | 93.22(15)  | 91.57(6)  |
| C7-O1     | 1.247(6)   | 1.245(3)   | N3-Fe1-N4 | 80.5(2)    | 81.52(7)  |
| C7-N2     | 1.348(7)   | 1.338(3)   | N3-Fe1-S1 | 90.57(14)  | 89.88(5)  |
| C20-O2    | 1.258(7)   | 1.249(3)   | N3-Fe1-S2 | 171.22(15) | 174.39(5) |
| C20-N4    | 1.332(7)   | 1.337(3)   | N4-Fe1-S1 | 93.45(15)  | 94.05(6)  |
| O1-C7-N2  | 123.5(6)   | 124.2(2)   | N4-Fe1-S2 | 90.78(15)  | 93.09(6)  |
| O2-C20-N4 | 123.0(6)   | 123.0(2)   | S1-Fe1-S2 | 89.15(7)   | 88.94(2)  |
| N1-Fe1-N2 | 79.8(2)    | 81.59(7)   |           |            |           |

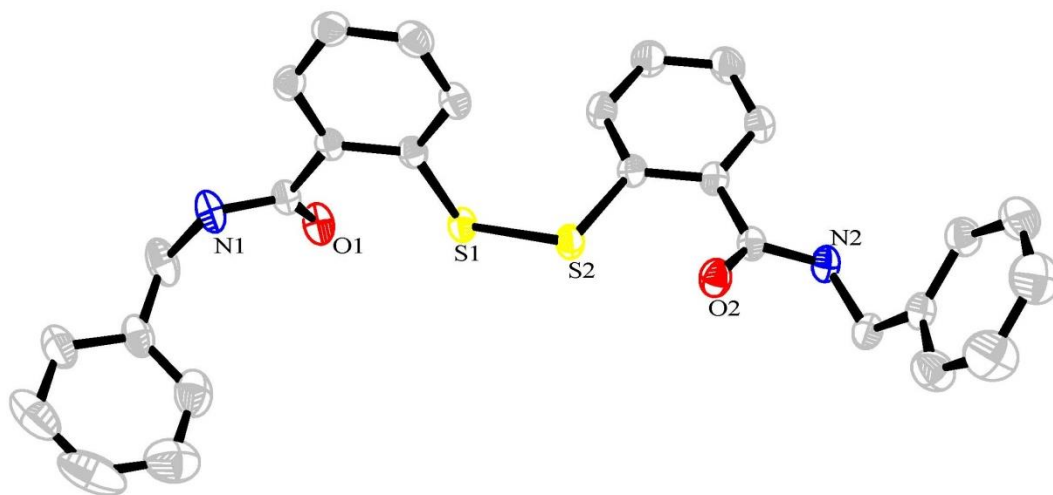

**Figure S1.** ORTEP drawings of **2b**. Thermal ellipsoids are drawn at the 35 % probability level, and the hydrogen atoms are omitted for clarity.

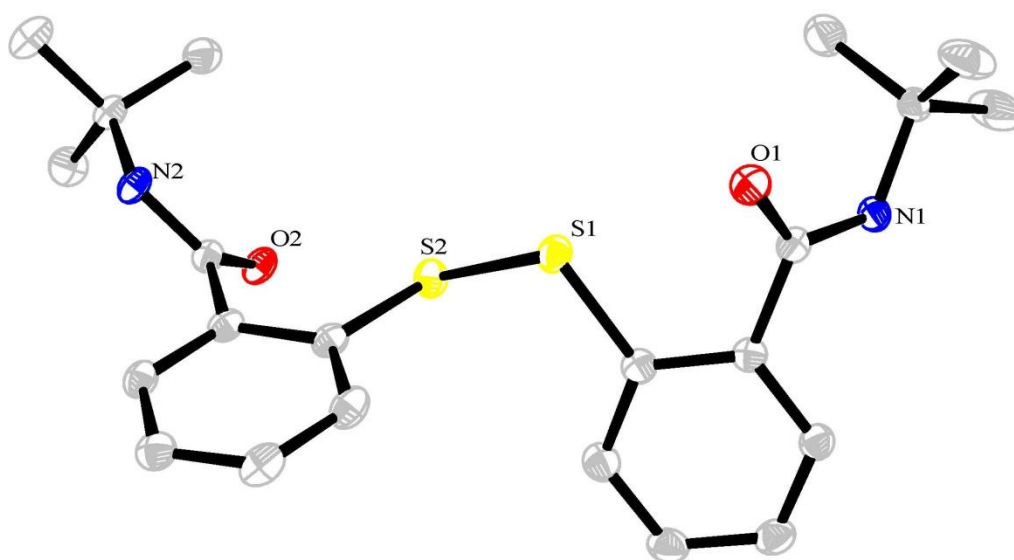

**Figure S2.** ORTEP drawings of **2c**. Thermal ellipsoids are drawn at the 35 % probability level, and the hydrogen atoms are omitted for clarity.

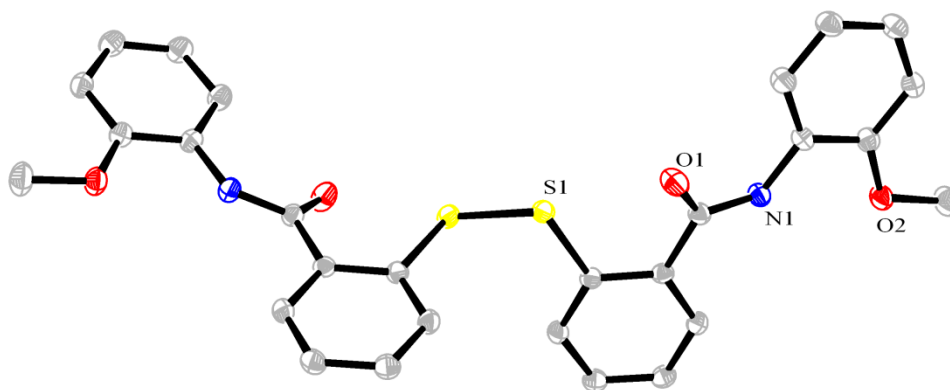

**Figure S3.** ORTEP drawings of **2e**. Thermal ellipsoids are drawn at the 35 % probability level, and the hydrogen atoms and the disorder atoms are omitted for clarity.



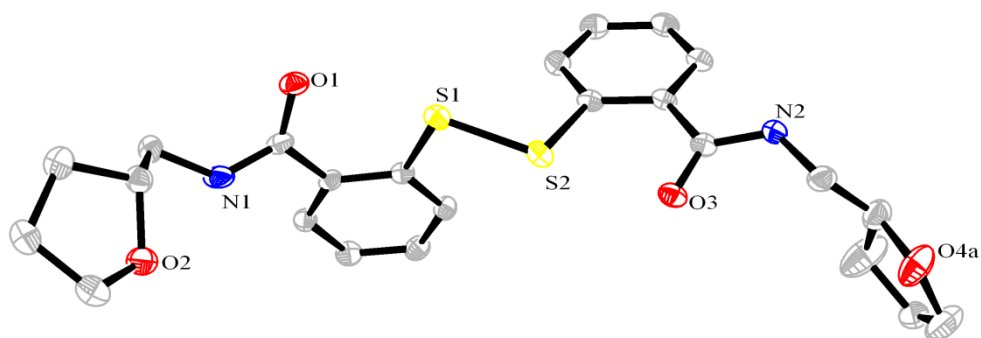

**Figure S4.** ORTEP drawings of **2f**. Thermal ellipsoids are drawn at the 35 % probability level, and the hydrogen atoms and the disorder atoms are omitted for clarity.

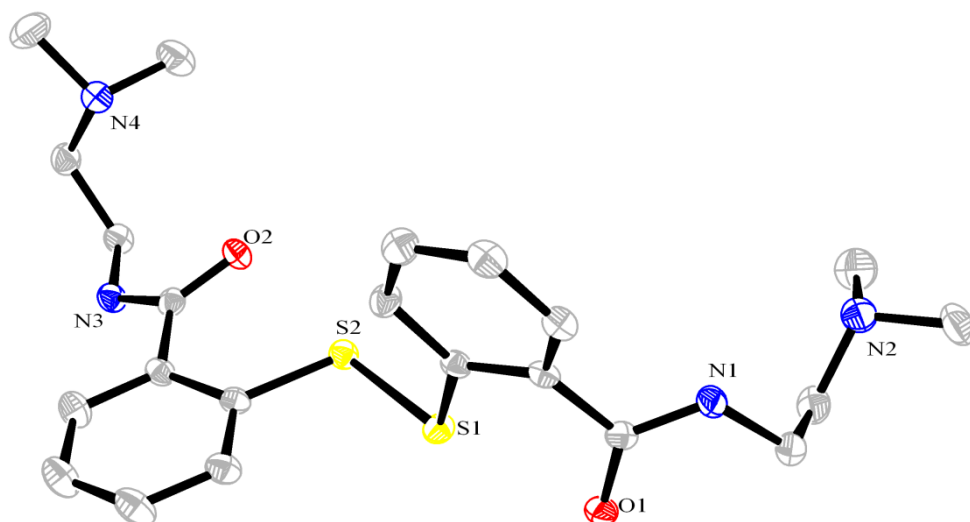

**Figure S5.** ORTEP drawings of **2i**. Thermal ellipsoids are drawn at the 35 % probability level, and the hydrogen atoms are omitted for clarity.

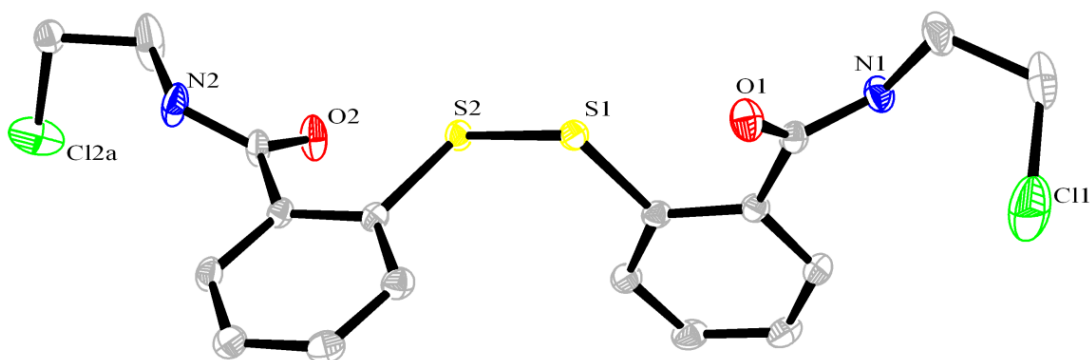

**Figure S6.** ORTEP drawings of **2j**. Thermal ellipsoids are drawn at the 35 % probability level, and the hydrogen atoms and the disorder atoms are omitted for clarity.

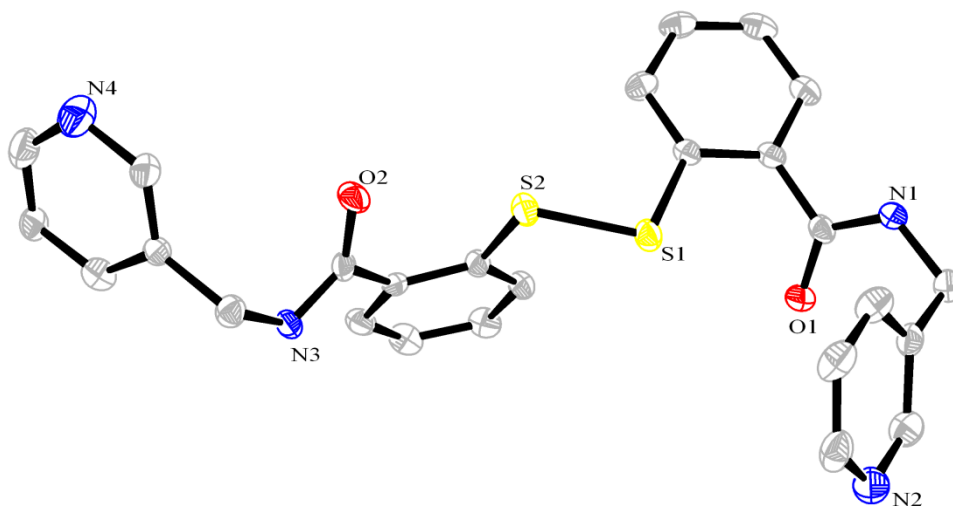

**Figure S7.** ORTEP drawings of **2n**. Thermal ellipsoids are drawn at the 35 % probability level, and the hydrogen atoms are omitted for clarity.

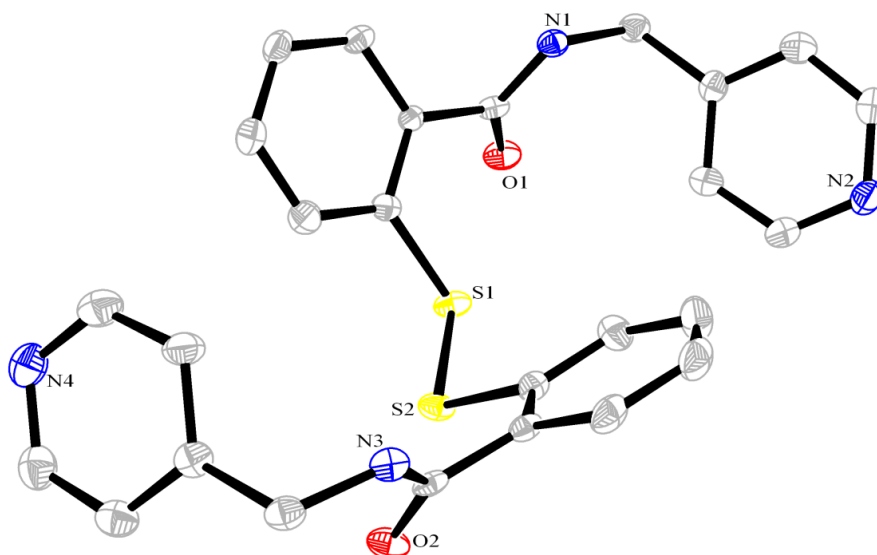

**Figure S8.** ORTEP drawings of **2o**. Thermal ellipsoids are drawn at the 35 % probability level, and the hydrogen atoms are omitted for clarity.

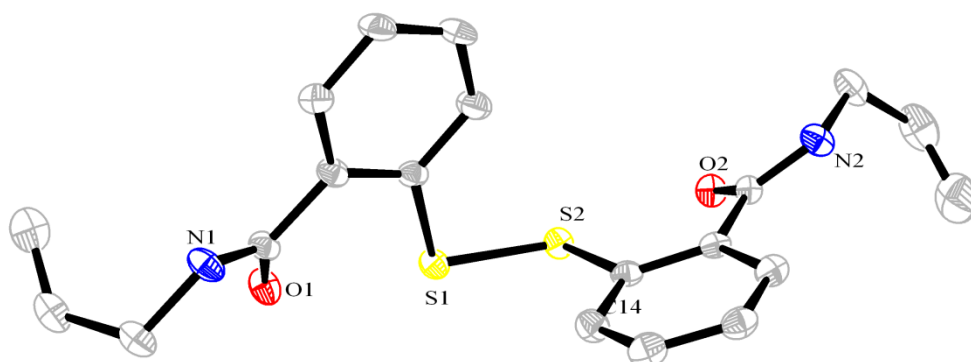

**Figure S9.** ORTEP drawings of **2p**. Thermal ellipsoids are drawn at the 35 % probability level, and the hydrogen atoms are omitted for clarity.

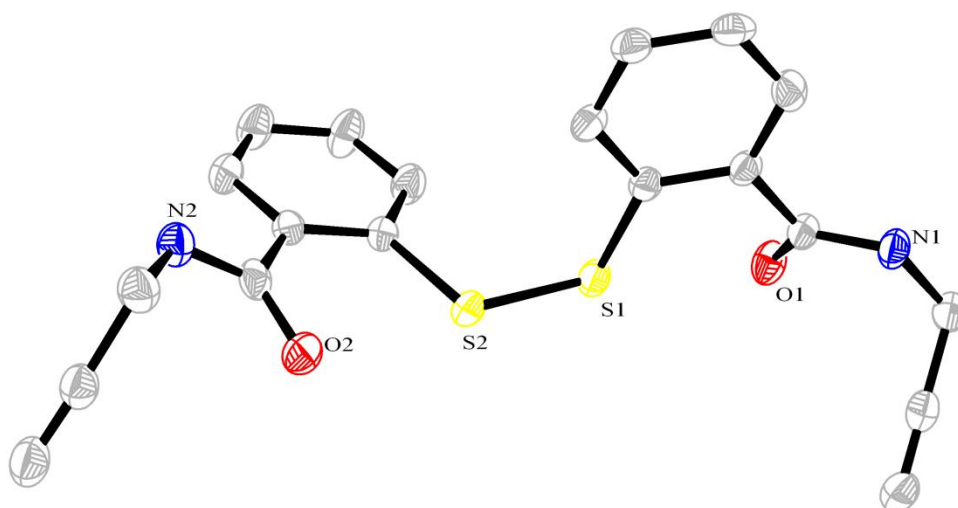

**Figure S10.** ORTEP drawings of **2q**. Thermal ellipsoids are drawn at the 35 % probability level, and the hydrogen atoms are omitted for clarity.

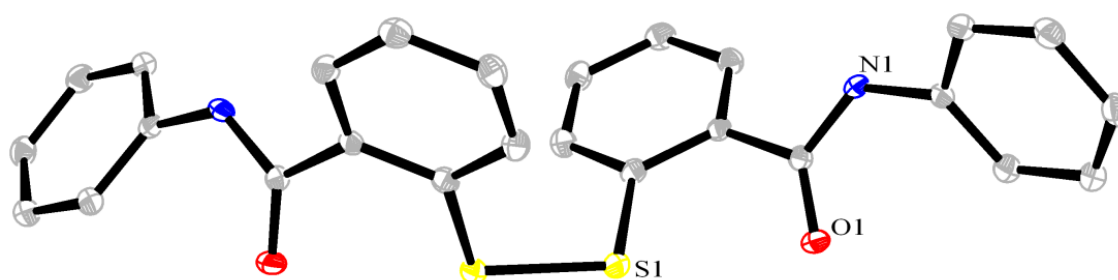

**Figure S11.** ORTEP drawings of **2r**. Thermal ellipsoids are drawn at the 35 % probability level, and the hydrogen atoms are omitted for clarity.

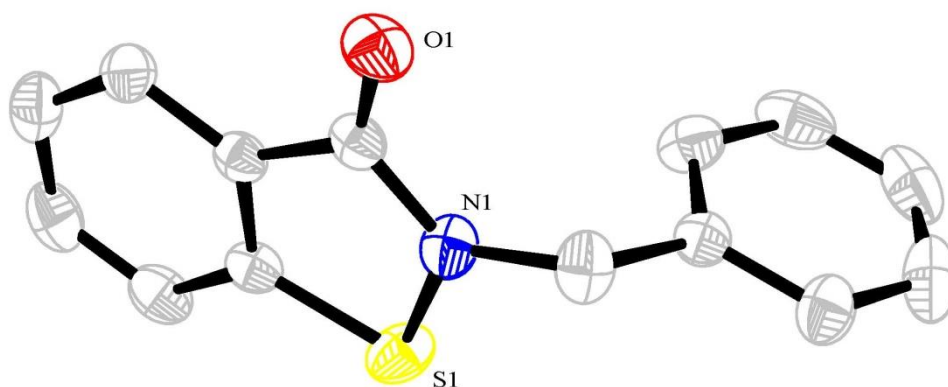

**Figure S12.** ORTEP drawings of **3b**. Thermal ellipsoids are drawn at the 35 % probability level and the hydrogen atoms are omitted for clarity.

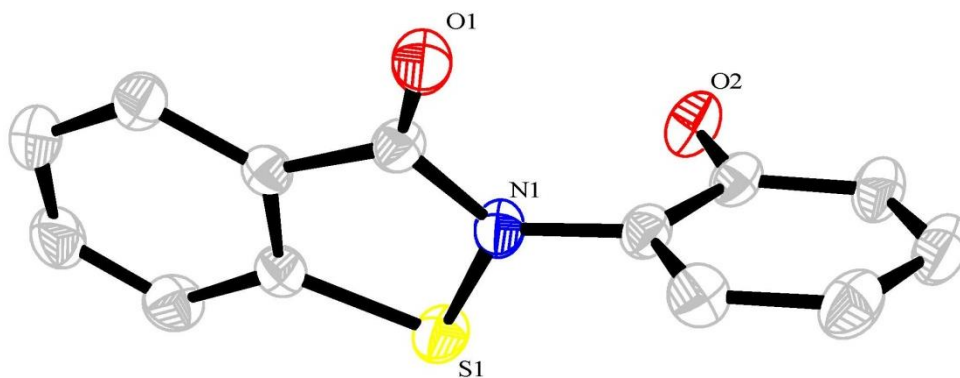

**Figure S13.** ORTEP drawings of **3d**. Thermal ellipsoids are drawn at the 35 % probability level, and the hydrogen atoms are omitted for clarity.

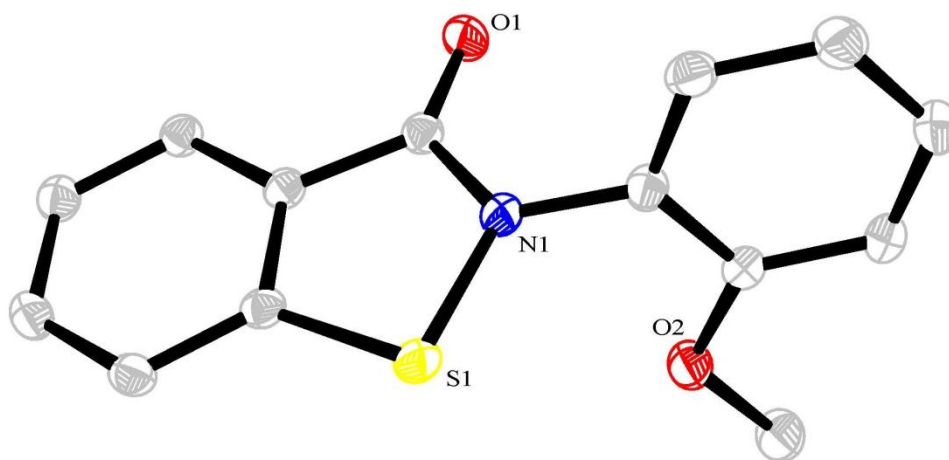

**Figure S14.** ORTEP drawings of **3e**. Thermal ellipsoids are drawn at the 35 % probability level, and the hydrogen atoms are omitted for clarity.

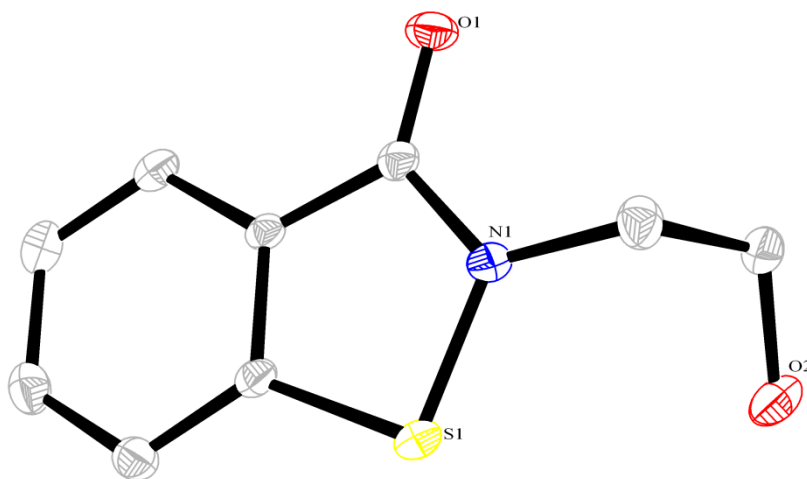

**Figure S15.** ORTEP drawings of **3h**. Thermal ellipsoids are drawn at the 35 % probability level, and the hydrogen atoms are omitted for clarity.

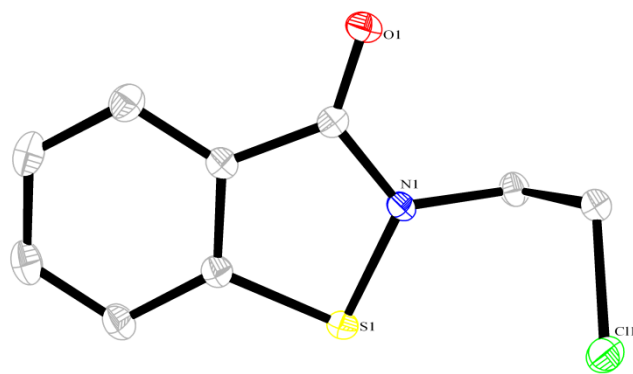

**Figure S16.** ORTEP drawings of **3j**. Thermal ellipsoids are drawn at the 35 % probability level, and the hydrogen atoms are omitted for clarity.

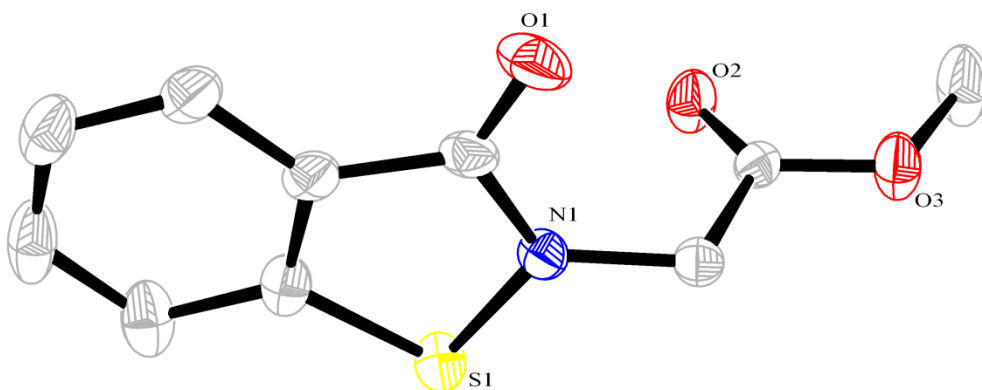

**Figure S17.** ORTEP drawings of **3l**. Thermal ellipsoids are drawn at the 35 % probability level, and the hydrogen atoms are omitted for clarity.

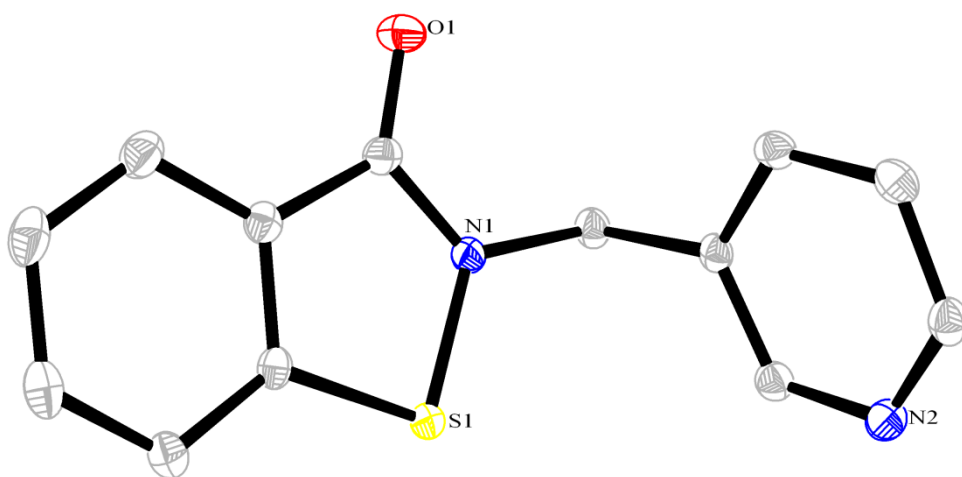

**Figure S18.** ORTEP drawings of **3n**. Thermal ellipsoids are drawn at the 35 % probability level, and the hydrogen atoms and are omitted for clarity.

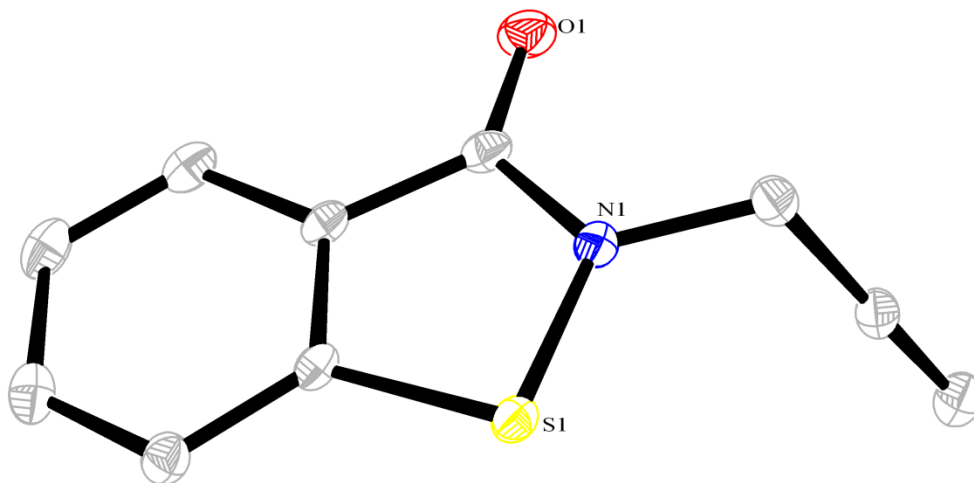

**Figure S19.** ORTEP drawings of **3q**. Thermal ellipsoids are drawn at the 35 % probability level, and the hydrogen atoms are omitted for clarity.

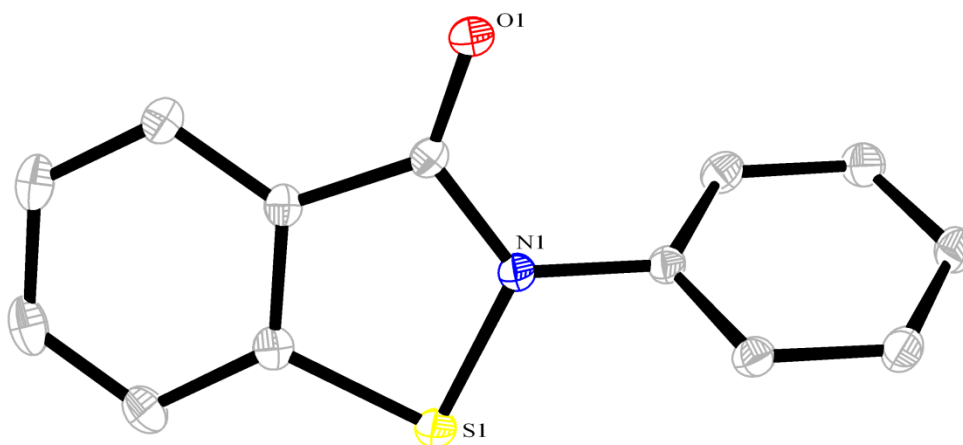

**Figure S20.** ORTEP drawings of **3r**. Thermal ellipsoids are drawn at the 35 % probability level, and the hydrogen atoms and the disorder atoms are omitted for clarity.

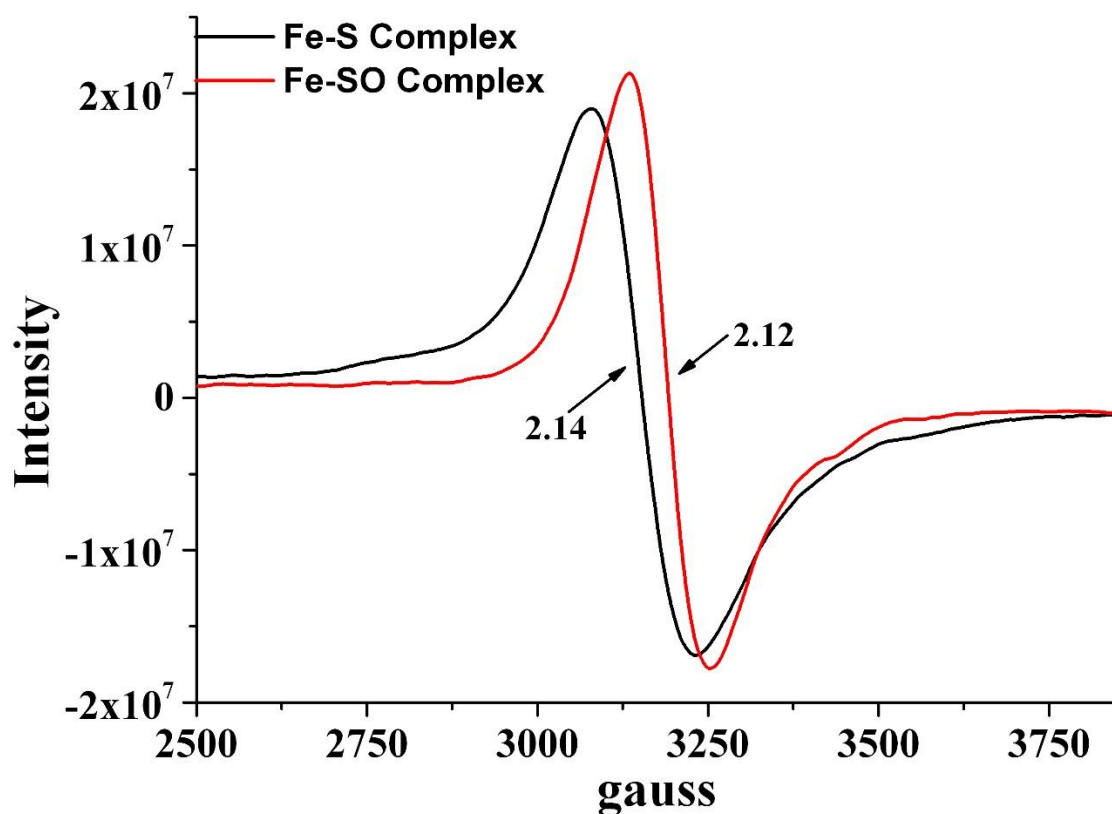

**Figure S21.** X-band EPR spectra (77K,  $\text{CH}_3\text{CN}$ ) of complex **1** and **4**. Spectrometer settings: microwave frequency, 9.5 GHz; modulation frequency, 100 kHz; modulation amplitude, 10 G; time constant, 655.36 msec; conversion time, 40.96 msec; microwave power, 2 mW; receiver gain,  $8.93 \times 10^4$ .

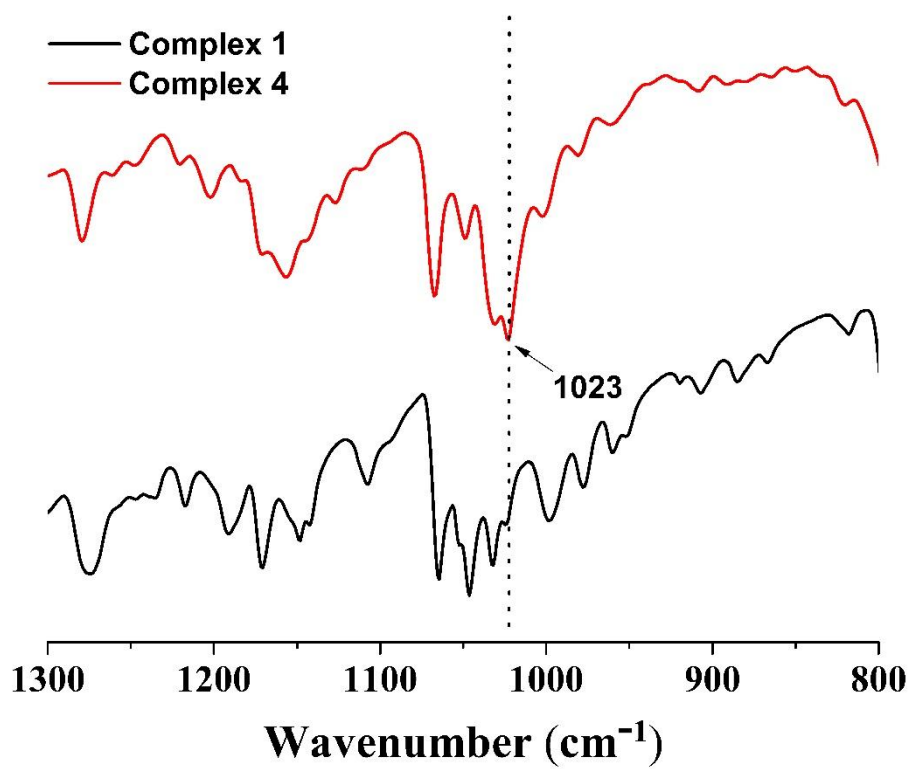

**Figure S22.** The solid IR spectra of complex 1 and 4.



## References

1. C.-C. Hsieh, Y.-C. Liu, M.-C. Tseng, M.-H. Chiang and Y.-C. Horng, *Dalton Trans.*, 2019, **48**, 379-386.
2. (a) J. M. Domagala, J. P. Bader, R. D. Gogliotti, J. P. Sanchez, M. A. Stier, Y. Song, J. V. N. Vara Prasad, P. J. Tummino, J. Scholten, P. Harvey, T. Holler, S. Gracheck, D. Hupe, W. G. Rice and R. Schultz, *Bioorganic & Medicinal Chemistry*, 1997, **5**, 569-579; (b) N. K. Senaratne, T. M. Mwanja, C. E. Moore and D. M. Eichhorn, *Inorganica Chimica Acta*, 2018, **476**, 27-37.
3. (a) L. Yang, L. Song, S. Tang, L. Li, H. Li, B. Yuan and G. Yang, *Eur. J. Org. Chem.*, 2019, **2019**, 1281-1285; (b) J. Su, J. Liu, C. Chen, Y. Zhang and K. Yang, *Bioorg. Chem.*, 2019, **84**, 192-201; (c) F. Viani, B. Rossi, W. Panzeri, L. Merlini, A. M. Martorana, A. Polissi and Y. M. Galante, *Tetrahedron*, 2017, **73**, 1745-1761; (d) R. Paul and T. Punniyamurthy, *RSC Advances*, 2012, **2**, 7057-7060.
4. G. M. Sheldrick, *SHELXTL, Version 5.1*, Bruker AXS Inc., Madison, WI, 1998.
5. L. E. Sutton, *Tables of Interatomic Distances and Configurations in Molecules and Ions*, Chemical Society Publications, UK, 1965.
